# Supplementary material for: Porphyrin- and Bodipy-helicene conjugates: syntheses, separation of enantiomers and chiroptical properties
Source: Royal Society of Chemistry journal article supplement (doi:10.1039/d3ob01459b), 2023-01-01

## SUPPORTING INFORMATION

### **PORPHYRIN- AND BODIPY-HELICENE CONJUGATES: SYNTHESSES, SEPARATION OF ENANTIOMERS AND CHIROPTICAL PROPERTIES**

Vincent Silber,<sup>a</sup> Marion Jean,<sup>b</sup> Nicolas Vanthuyne,<sup>b</sup> Natalia Del Rio,<sup>c</sup> Paola Matozzo,<sup>c</sup> Jeanne Crassous\*<sup>c</sup> and Romain Ruppert\*<sup>a</sup>

<sup>a</sup> Institut de Chimie, UMR CNRS 7177, Institut Le Bel, Université de Strasbourg, 4 rue Blaise Pascal, 67000 Strasbourg (France).

E-mail : rruppert@unistra.fr

<sup>b</sup> Aix-Marseille Université, UMR CNRS 7313, Centrale Marseille, iSm2, 13397 Marseille cedex 20, France.

<sup>c</sup> ISCR, UMR CNRS 6226, campus de Beaulieu, Université de Rennes, 35042 Rennes cedex, France.

E-mail: jeanne.crassous@univ-rennes1.fr

## **Table of contents**

|                                                          |           |
|----------------------------------------------------------|-----------|
| <b>NMR and MS data of compound 8</b>                     | <b>3</b>  |
| <b>Analytical chiral HPLC separation for compound 8</b>  | <b>8</b>  |
| <b>Kinetic of enantiomerisation of compound 8</b>        | <b>9</b>  |
| <b>NMR and MS data of compound 11</b>                    | <b>10</b> |
| <b>Analytical chiral HPLC separation for compound 11</b> | <b>13</b> |
| <b>Preparative separation for compound 11</b>            | <b>14</b> |
| <b>Electronic Circular Dichroism - compound 11</b>       | <b>15</b> |
| <b>NMR and MS data of compound 12</b>                    | <b>16</b> |
| <b>Analytical chiral HPLC separation for compound 12</b> | <b>19</b> |
| <b>Preparative separation for compound 12</b>            | <b>20</b> |
| <b>Electronic Circular Dichroism - compound 12</b>       | <b>21</b> |
| <b>NMR and MS data of compound 13</b>                    | <b>22</b> |
| <b>Analytical chiral HPLC separation for compound 13</b> | <b>25</b> |
| <b>Preparative separation for compound 13</b>            | <b>26</b> |
| <b>Electronic Circular Dichroism - compound 13</b>       | <b>27</b> |
| <b>NMR and MS data of compound 14</b>                    | <b>28</b> |
| <b>Analytical chiral HPLC separation for compound 14</b> | <b>31</b> |
| <b>Preparative separation for compound 14</b>            | <b>32</b> |
| <b>Electronic Circular Dichroism - compound 14</b>       | <b>33</b> |
| <b>NMR and MS data of compound 15</b>                    | <b>34</b> |
| <b>Analytical chiral HPLC separation for compound 15</b> | <b>37</b> |
| <b>Preparative separation for compound 15</b>            | <b>38</b> |
| <b>Electronic Circular Dichroism - compound 15</b>       | <b>39</b> |

## NMR and MS data of compound 8

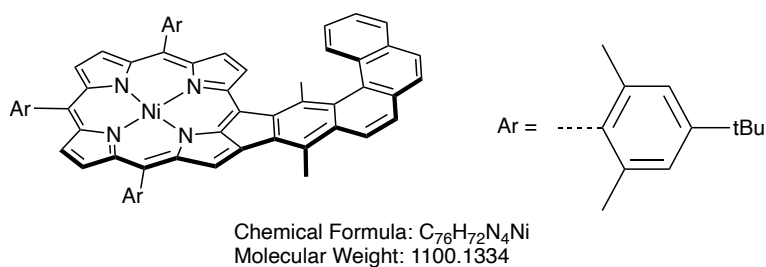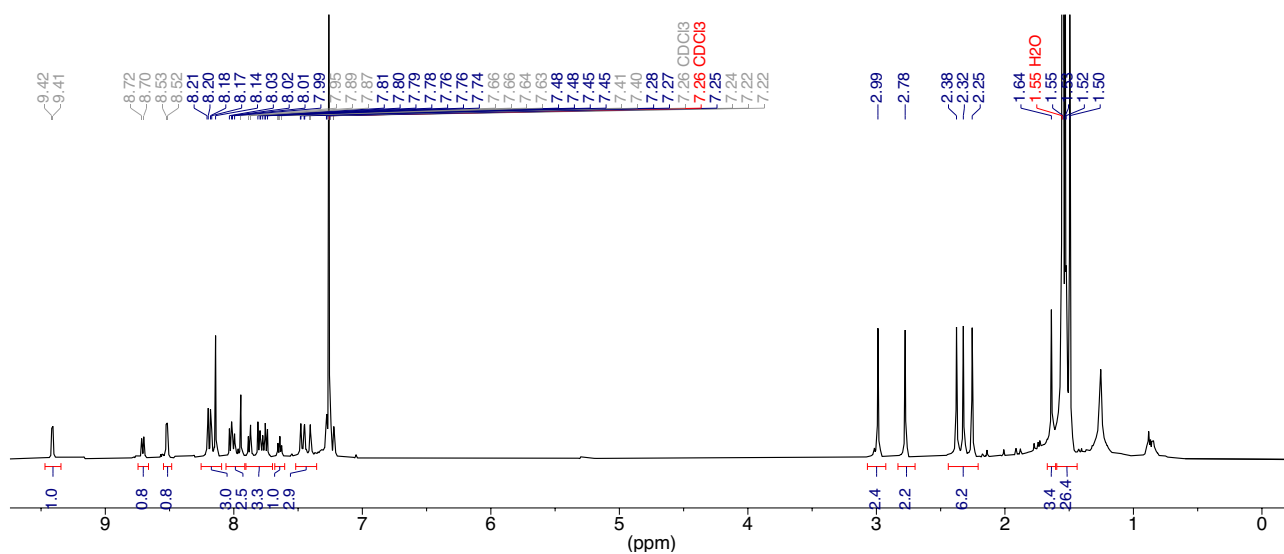

Figure S01:  $^1H$  NMR spectrum of compound **8** in  $CDCl_3$  at 298 K (500 MHz).

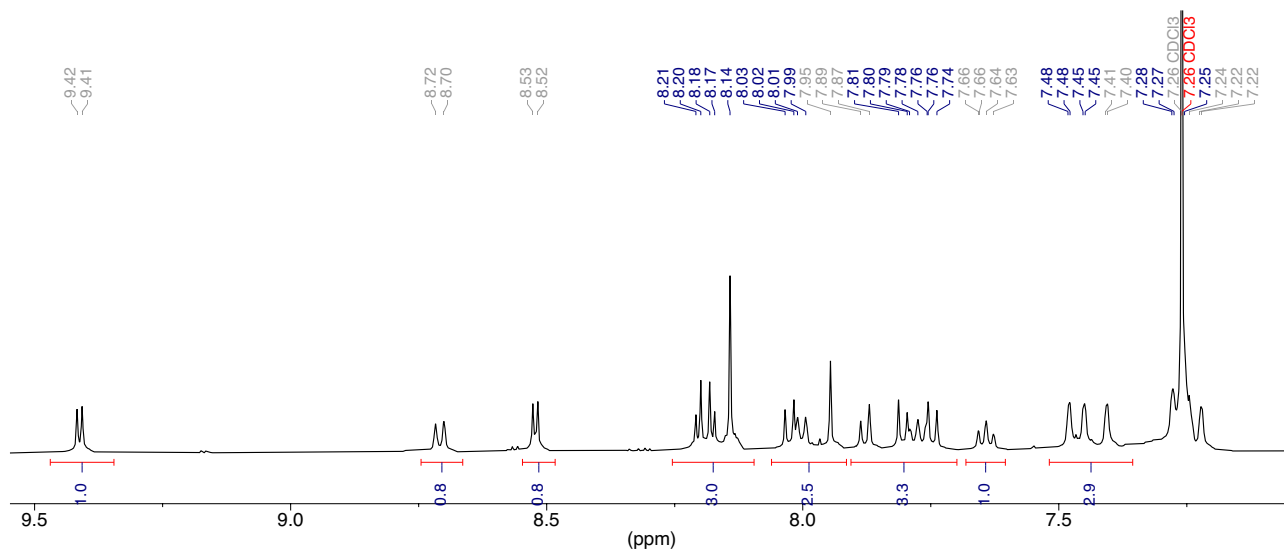

Figure S02:  $^1H$  NMR spectrum (aromatic area) of compound **8** in  $CDCl_3$  at 298 K (500 MHz).

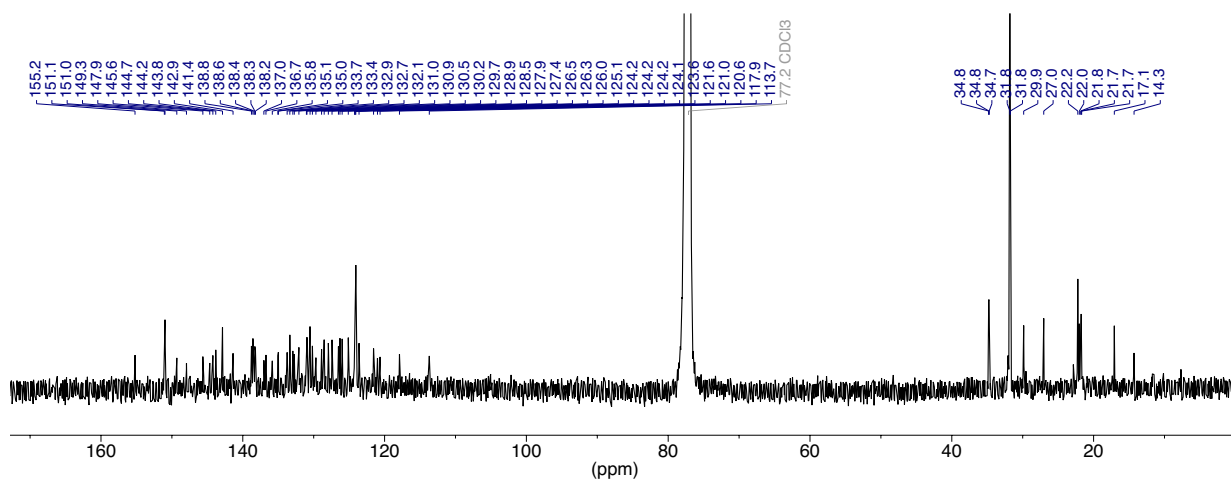

**Figure S03:**  $^{13}\text{C}$  NMR spectrum of compound **8** in  $\text{CDCl}_3$  at 298 K (126 MHz).

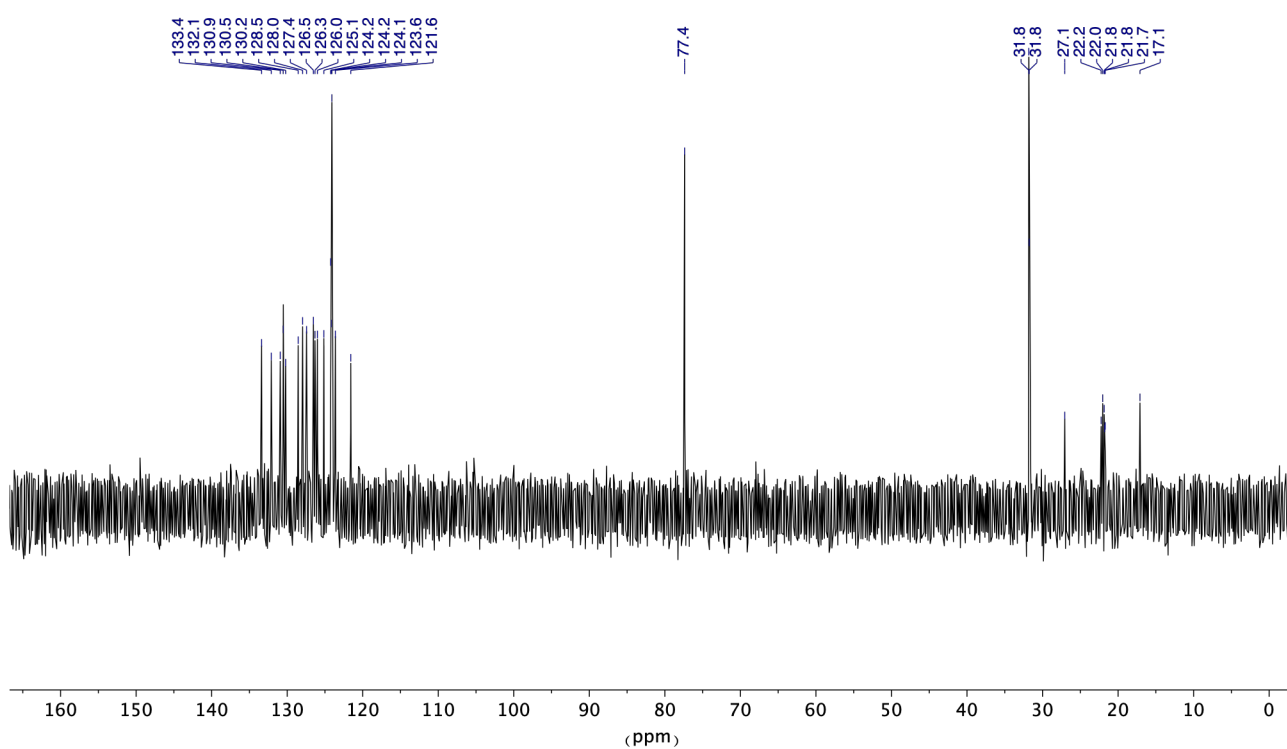

**Figure S04:**  $^{13}\text{C}$  NMR DEPT spectrum of compound **8** in  $\text{CDCl}_3$  at 298 K (126 MHz).

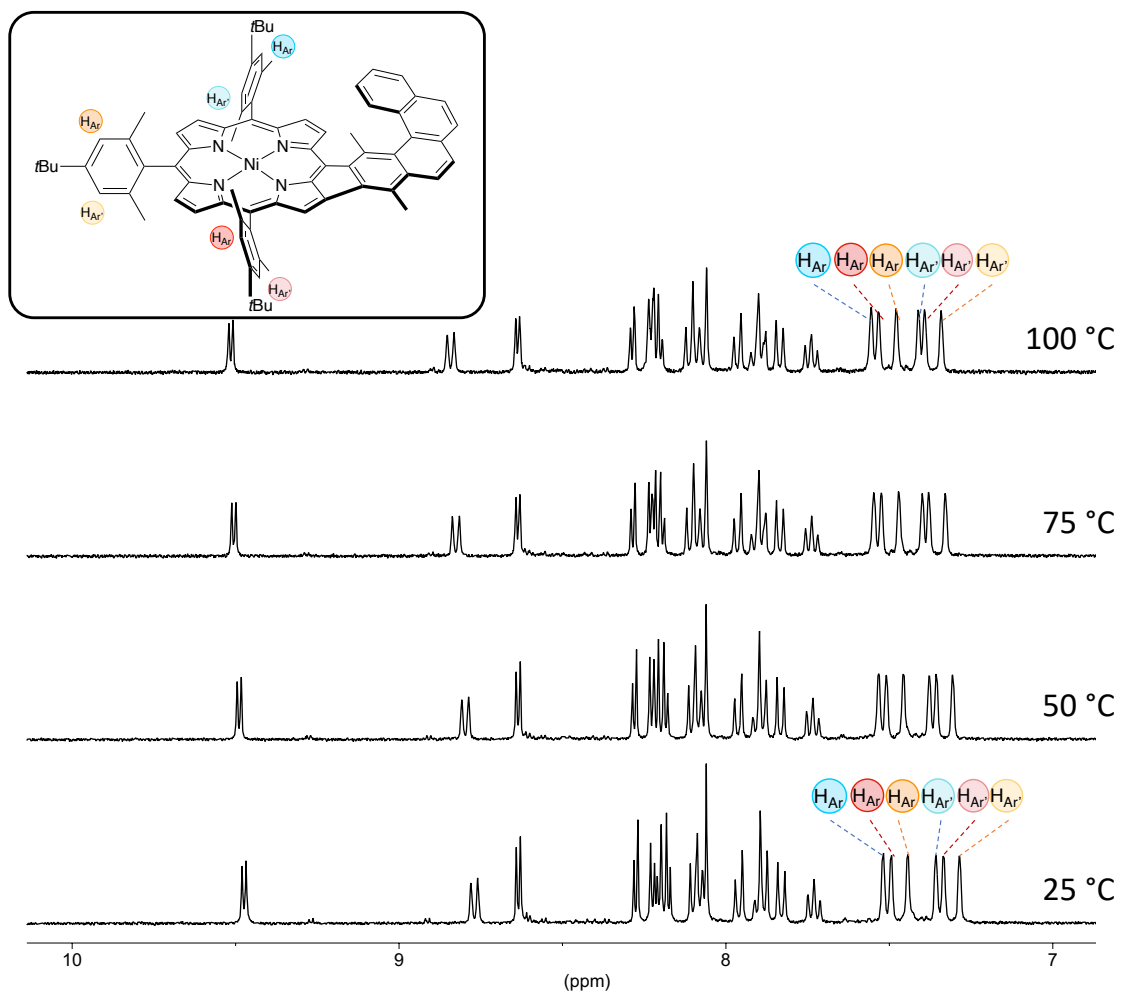

**Figure S05:**  $^1\text{H}$  NMR spectrum (aromatic area) of compound **8** in  $\text{C}_2\text{D}_2\text{Cl}_4$  at different temperatures.

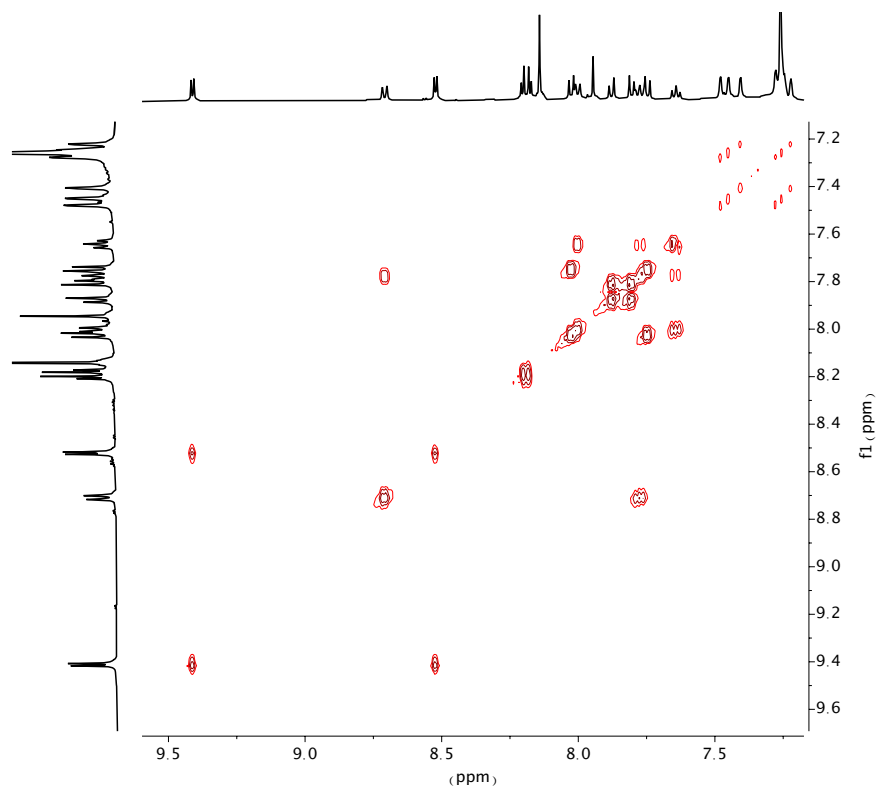

**Figure S06:**  $^1\text{H}$ - $^1\text{H}$  COSY NMR spectrum (aromatic area) of compound **8** in  $\text{CDCl}_3$ .

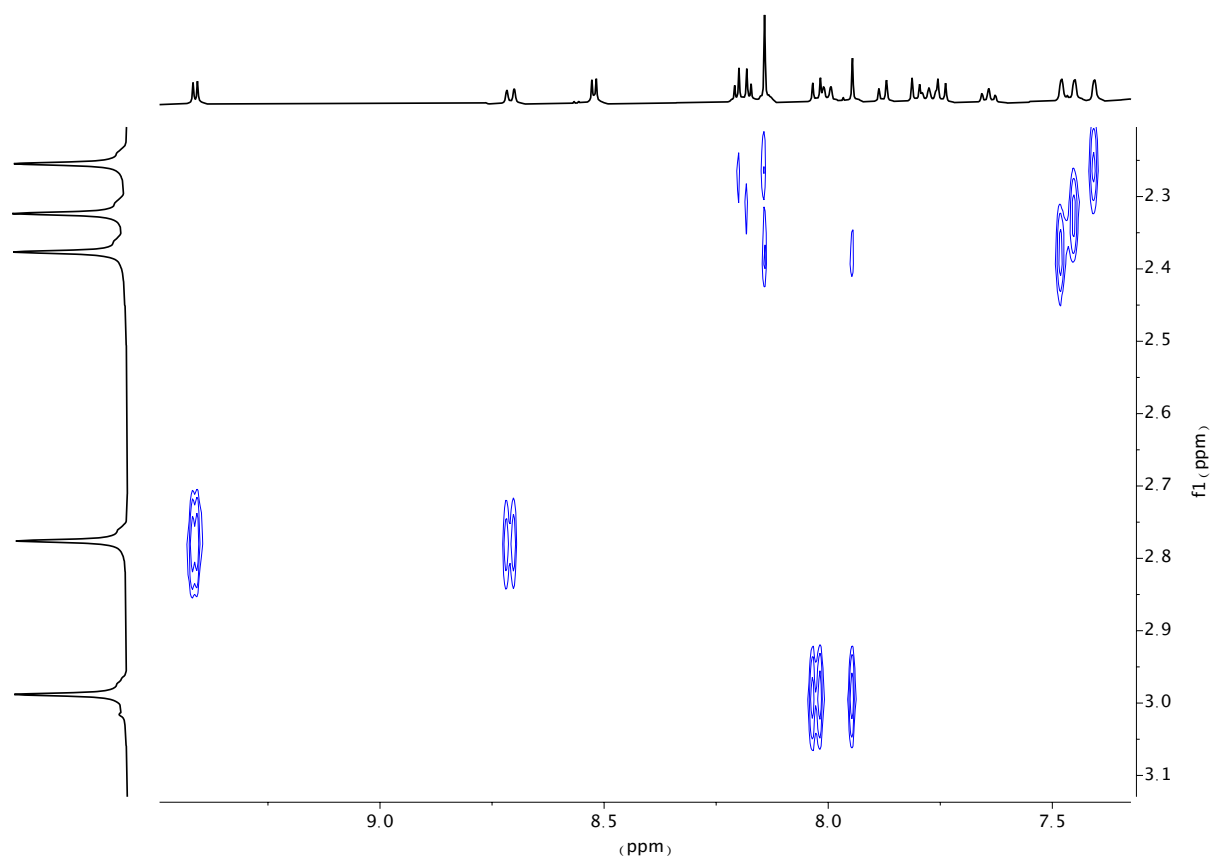

**Figure S07:** NOESY <sup>1</sup>H NMR spectrum (useful area for assignment) of compound **8** in CDCl<sub>3</sub>.

In compound **8**, all aromatic protons of the three *meso*-aryl groups are well separated and the three pairs of <sup>4</sup>J coupled protons were found at 7.51-7.31, 7.48-7.29 and 7.44-7.25 ppm (see Figure S06, top right corner). In addition all methyl groups are also well separated. All beta-pyrrolic protons are well separated: three AB systems (at 9.44-8.55, 8.23-8.21 and 8.19-8.16 ppm) and one singlet at 7.98 ppm. These beta-pyrrolic protons are close to methyl groups of the *meso*-aromatic substituents. From the NOESY spectrum (Figure S07), it can be deduced that the pyrrolic proton at 7.98 ppm is close to the methyl group at 2.41 ppm and the aromatic proton at 7.51 ppm. The pyrrolic protons at 8.16-8.19 ppm are also close to the methyl groups at 2.41 ppm and 2.28 ppm (corresponding to the aromatic proton at 7.44 ppm).

**Analysis Info**

Analysis Name F10334SK.d  
Method Tune\_pos\_Mid.m  
Sample Name VS443  
Comment

Acquisition Date 17/09/2021 11:28:07  
Operator BDAL@DE  
Instrument micrOTOF II

**Acquisition Parameter**

|              |          |           |        |            |           |             |      |
|--------------|----------|-----------|--------|------------|-----------|-------------|------|
| Source Type  | ESI      | Capillary | 4500 V | Nebulizer  | 0.3 Bar   | Corona      | 0 nA |
| Ion Polarity | Positive | n/a       | n/a    | Dry Gas    | 3.0 l/min | n/a         | n/a  |
| n/a          | n/a      | n/a       | n/a    | Dry Heater | 200 °C    | APCI Heater | 0 °C |

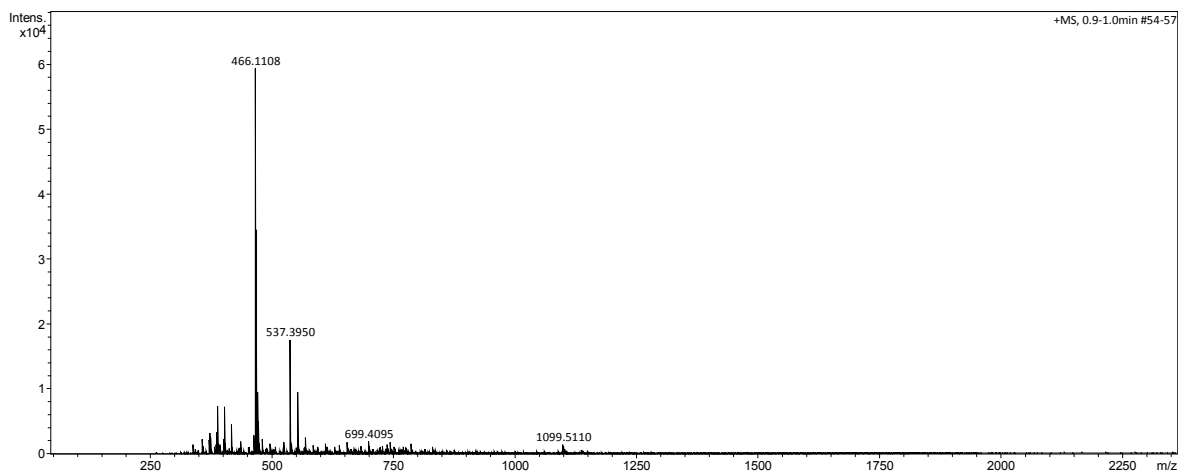

Bruker Daltonics DataAnalysis 3.1

printed: 17/09/2021 15:53:30

Page 1 of 1

**Figure S08.** HRMS of compound **8**.**Acquisition Parameter**

|             |          |              |          |                    |          |
|-------------|----------|--------------|----------|--------------------|----------|
| Source Type | ESI      | Ion Polarity | Positive | Set Corrector Fill | 50.9 V   |
| n/a         | n/a      | n/a          | n/a      | n/a                | n/a      |
| Scan Begin  | 50 m/z   | n/a          | n/a      | Set Reflector      | 1800.0 V |
| Scan End    | 3000 m/z | n/a          | n/a      | Set Flight Tube    | 8600.0 V |
|             |          |              |          | Set Detector TOF   | 2008.9 V |

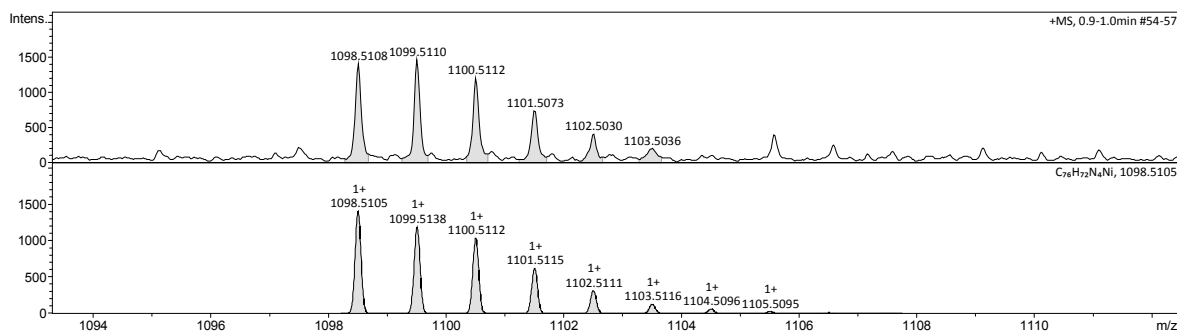

| Meas. m/z   | # | Ion Formula | m/z err [ppm] | Mean err [ppm] | rdb   | N-Rule | e <sup>-</sup> | Conf | mSigma | Std I | Std Mean m/z | Std I | VarNorm | Std m/z Diff | Std Comb Dev |
|-------------|---|-------------|---------------|----------------|-------|--------|----------------|------|--------|-------|--------------|-------|---------|--------------|--------------|
| 1098.510785 | 1 | C76H72N4Ni  | 1098.510493   | -0.3           | 932.8 | 43.0   | ok             | odd  | 74.3   | 46.9  | n.a.         | n.a.  | n.a.    | n.a.         | n.a.         |

**Figure S09.** HRMS of compound **8** (top: experimental MS, bottom: simulation)

## Analytical chiral HPLC separation for compound 8

- The sample is dissolved in dichloromethane, injected on the chiral column, and detected with a UV detector at 254 nm and a circular dichroism detector at 254 nm. The flow-rate is 1 mL/min.

| Column                  | Mobile Phase                      | t1       | k1   | t2       | k2   | $\alpha$ | R <sub>s</sub> |
|-------------------------|-----------------------------------|----------|------|----------|------|----------|----------------|
| ( <i>S,S</i> )-Whelk-O1 | Heptane / dichloromethane (80/20) | 5.52 (+) | 0.87 | 8.27 (-) | 1.80 | 2.06     | 6.34           |

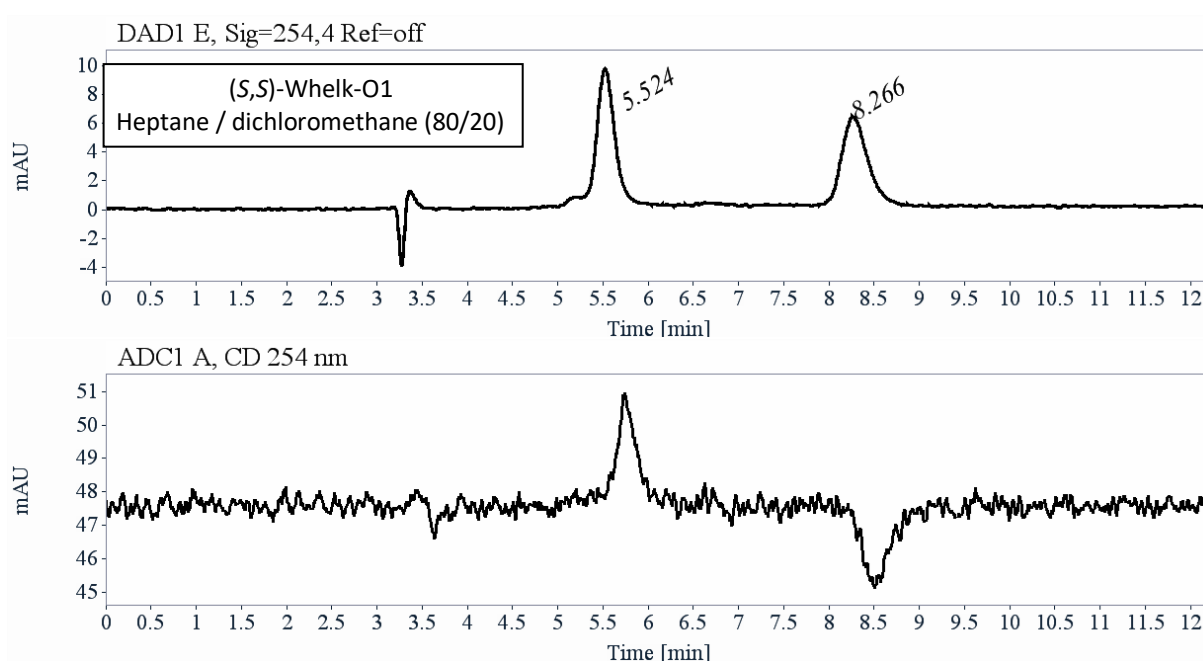

| RT [min] | Area | Area%  | Capacity Factor | Enantioselectivity | Resolution (USP) |
|----------|------|--------|-----------------|--------------------|------------------|
| 5.52     | 147  | 53.22  | 0.87            |                    |                  |
| 8.27     | 129  | 46.78  | 1.80            | 2.06               | 6.34             |
| Sum      | 276  | 100.00 |                 |                    |                  |

One injection was done on (*S,S*)-Whelk-O1 (250 x 10 mm), with hexane / dichloromethane (80/20) as mobile phase, flow-rate = 5 mL/min and UV detection at 254 nm, to obtain an enantio-enriched solution of the second eluted enantiomer in the mobile phase.



## Kinetic of enantiomerisation of compound 8

An enantio-enriched solution in the second eluted enantiomer of compound **8** is thermostated at 25°C in the mixture heptane / dichloromethane (80/20). 10 µL are taken and then injected on (*S,S*)-Whelk-O1 (80:20 heptane / dichloromethane, 1 mL/min, UV 254 nm). The percentage decrease of the second eluted enantiomer is monitored.

| Time (min) | % second eluted enantiomer | $\ln ((\%t-50\%)/(\%(t=0)-50\%))$ |
|------------|----------------------------|-----------------------------------|
| 0.00       | 89.953                     | 0.00000                           |
| 11.45      | 78.705                     | -0.33063                          |
| 22.97      | 69.134                     | -0.73624                          |
| 34.50      | 62.851                     | -1.13428                          |
| 46.05      | 59.031                     | -1.48704                          |
| 57.58      | 56.402                     | -1.83109                          |

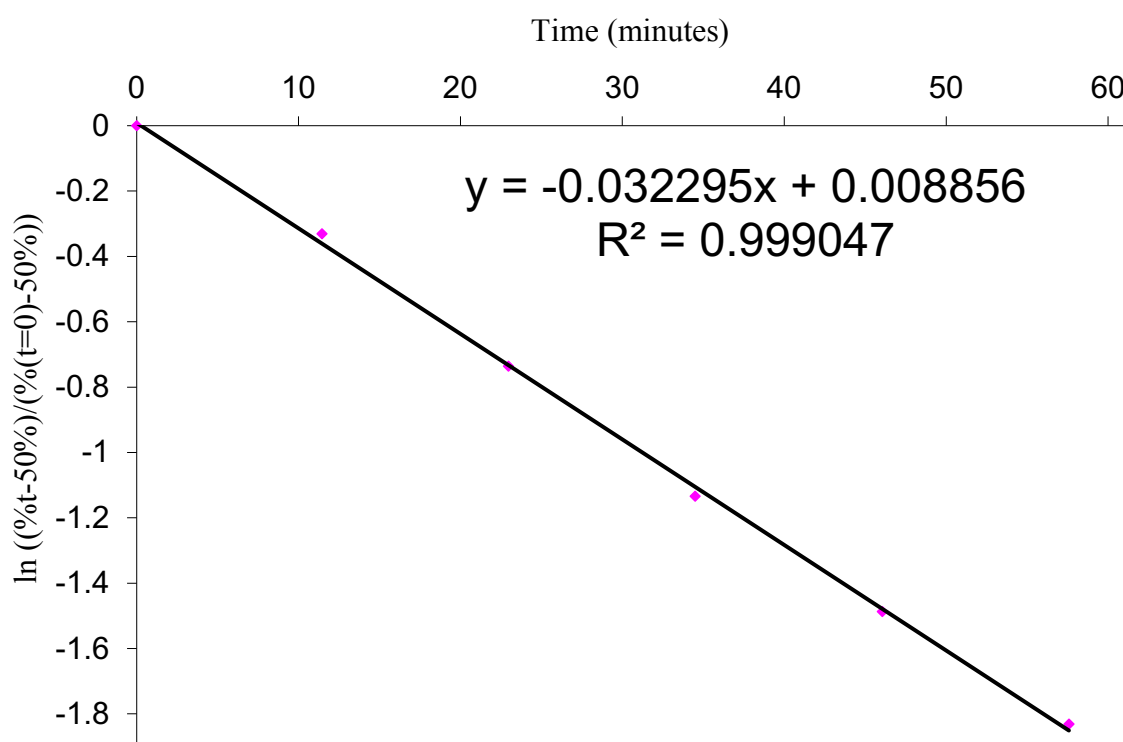

$k_{\text{enantiomerisation}} = 2.69 \cdot 10^{-4} \text{ s}^{-1}$  (25°C, heptane / dichloromethane 80:20)

$\Delta G^\ddagger = 93.4 \text{ kJ} \cdot \text{mol}^{-1}$  (25°C, heptane / dichloromethane 80:20)

$t_{1/2} = 21 \text{ minutes}$  (25°C, heptane / dichloromethane 80:20)

## NMR data of compound 11

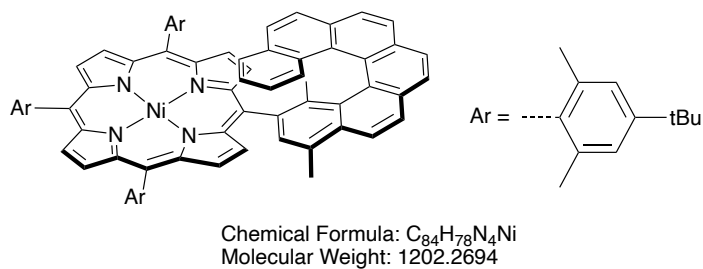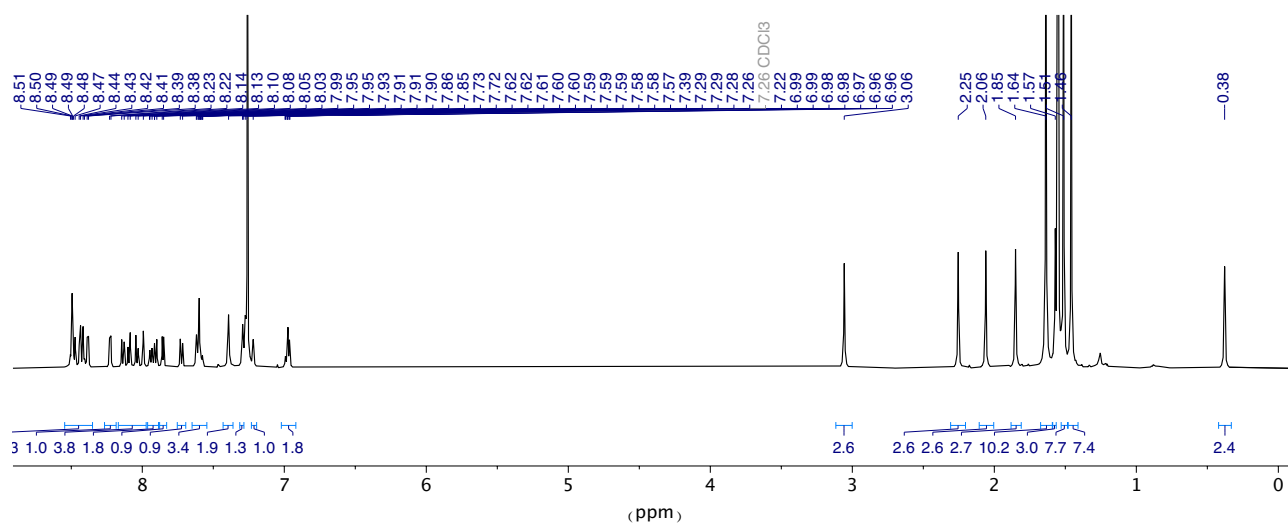

**Figure S10:** <sup>1</sup>H NMR spectrum of compound **11** in CDCl<sub>3</sub> at 298 K (500 MHz).

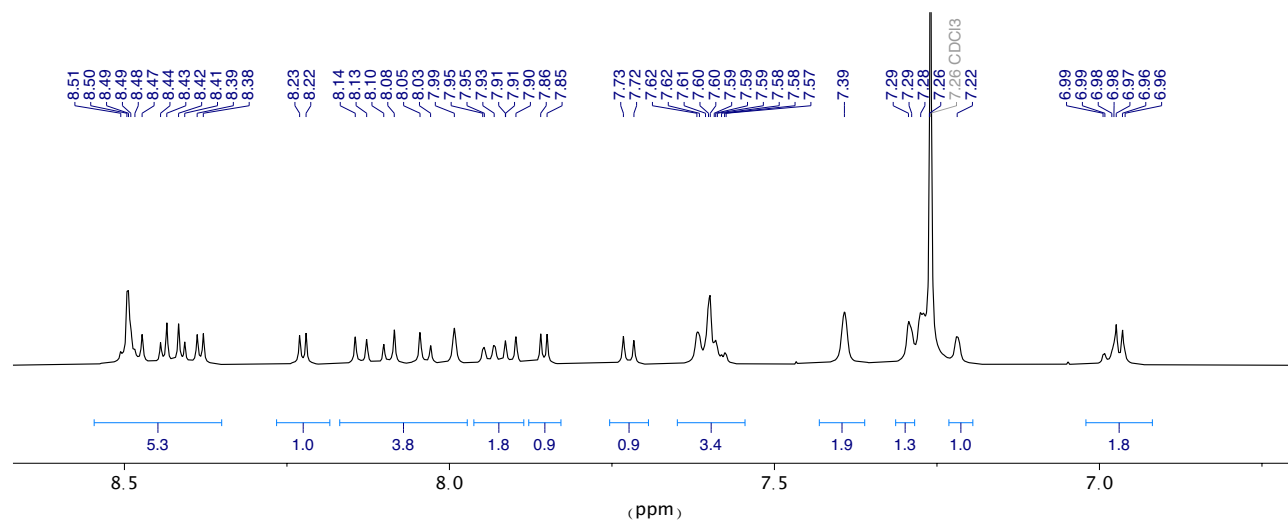

**Figure S11:** <sup>1</sup>H NMR spectrum (aromatic area) of compound **11** in CDCl<sub>3</sub> at 298 K (500 MHz).

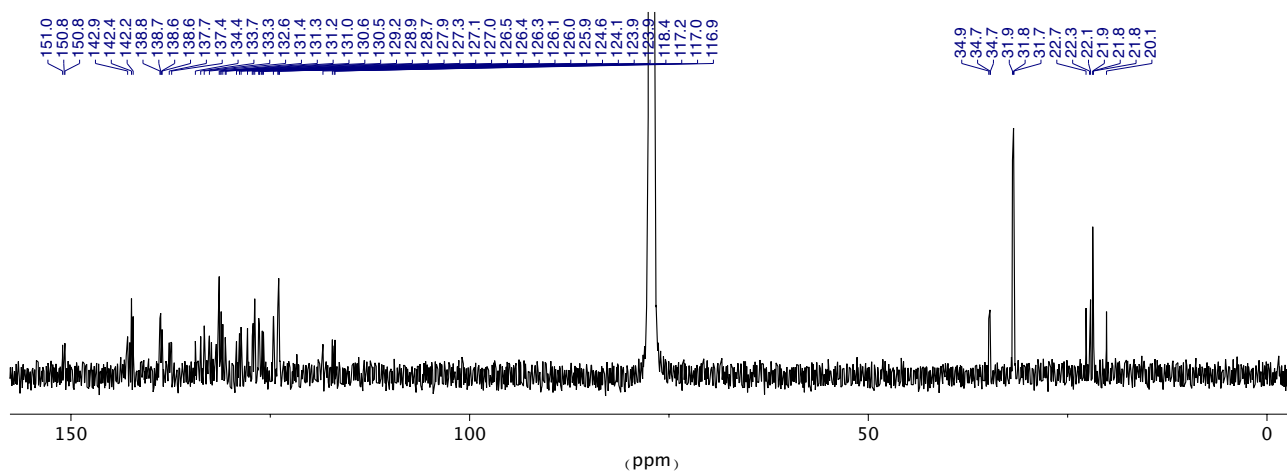

**Figure S12:**  $^{13}\text{C}$  NMR spectrum of compound **11** in  $\text{CDCl}_3$  at 298 K (126 MHz).

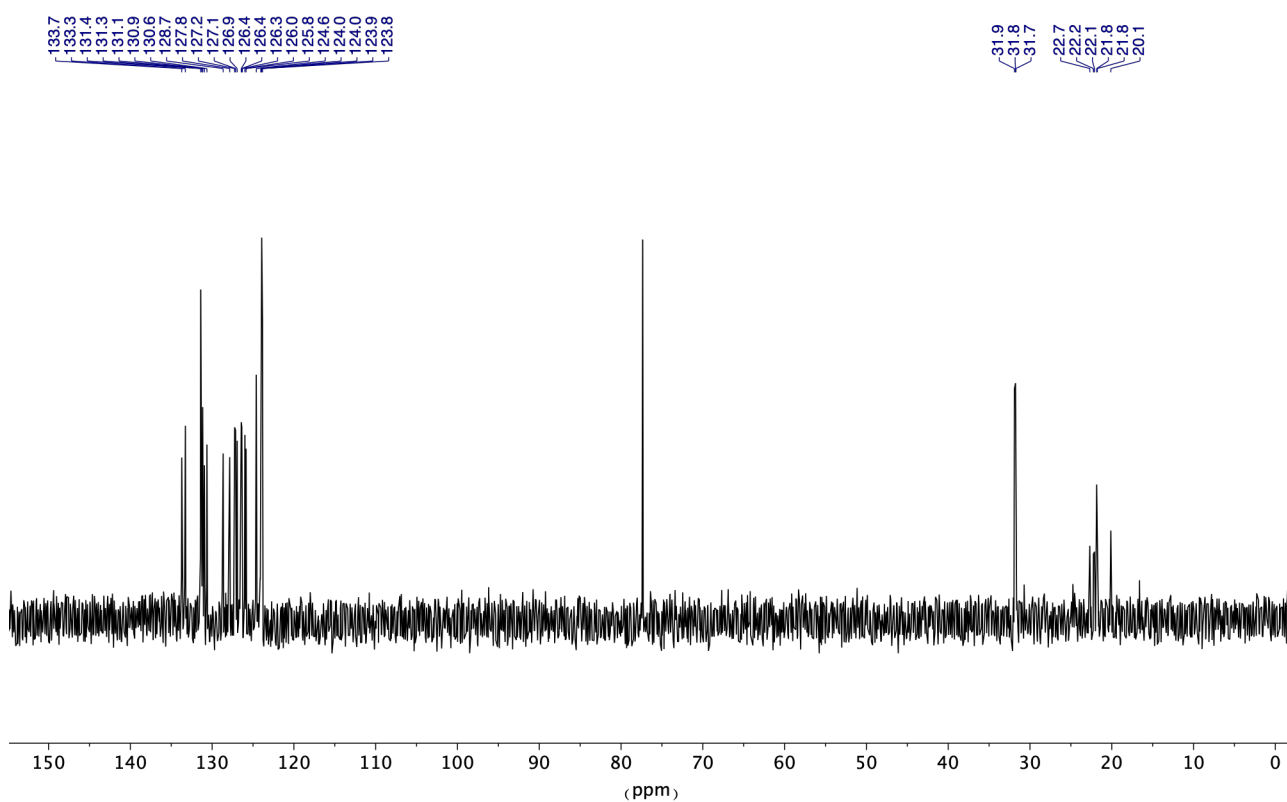

**Figure S13:**  $^{13}\text{C}$  NMR DEPT spectrum of compound **11** in  $\text{CDCl}_3$  at 298 K (126 MHz).

**Analysis Info**

Analysis Name F15685SK.d  
Method Tune\_pos\_Mid.m  
Sample Name VS453

Acquisition Date 10/16/2023 3:07:24 PM  
Operator BDAL@DE  
Instrument micrOTOF II

**Acquisition Parameter**

|              |          |            |        |           |           |                    |           |
|--------------|----------|------------|--------|-----------|-----------|--------------------|-----------|
| Source Type  | ESI      | Capillary  | 4500 V | Nebulizer | 0.3 Bar   | Set Hexapole RF    | 330.0 Vpp |
| Ion Polarity | Positive | Dry Heater | 200 °C | Dry Gas   | 3.0 l/min | Set Capillary Exit | 150.0 V   |

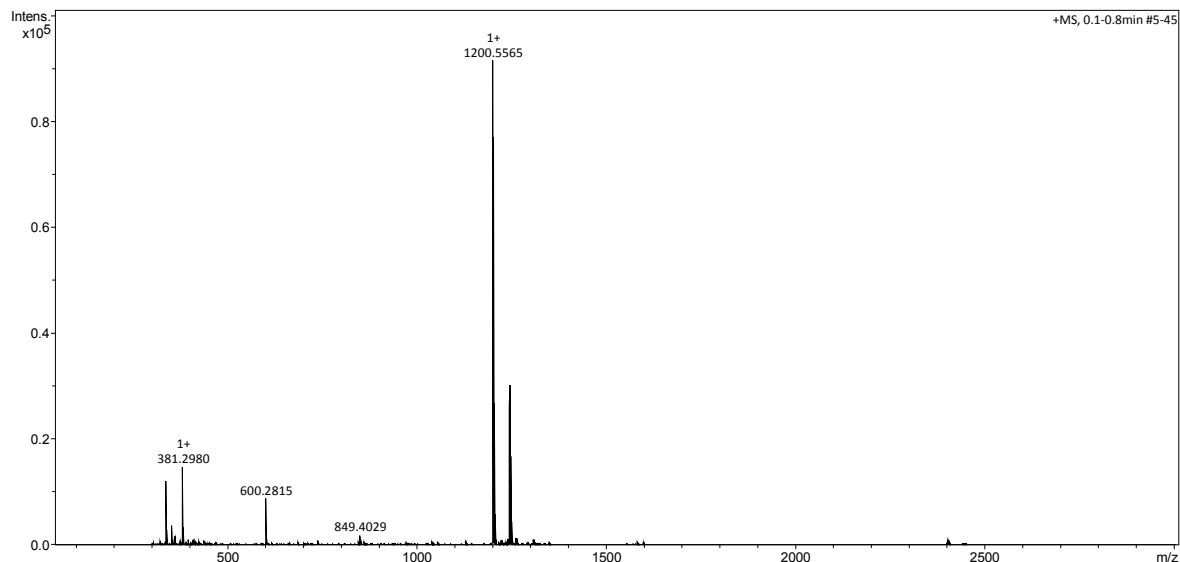

**Figure S14.** HRMS of compound **11** (the peak at 2400 corresponds to the assembly of a neutral molecule with the cationic molecule, at 600 the doubly charged molecule and at 1245 the addition of formate).

**Acquisition Parameter**

|             |          |              |          |                    |          |
|-------------|----------|--------------|----------|--------------------|----------|
| Source Type | ESI      | Ion Polarity | Positive | Set Corrector Fill | 48.2 V   |
| n/a         | n/a      | n/a          | n/a      | n/a                | n/a      |
| Scan Begin  | 50 m/z   | n/a          | n/a      | Set Reflector      | 1800.0 V |
| Scan End    | 3000 m/z | n/a          | n/a      | Set Flight Tube    | 8600.0 V |
|             |          |              |          | Set Detector TOF   | 2021.6 V |

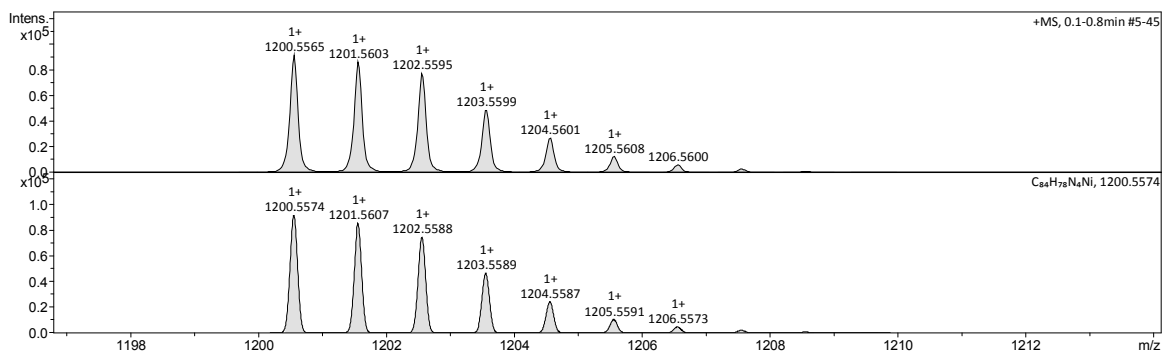

|                          |               |                |      |        |                |      |        |       |      |          |       |         |         |      |      |      |      |
|--------------------------|---------------|----------------|------|--------|----------------|------|--------|-------|------|----------|-------|---------|---------|------|------|------|------|
| Meas. m/z # Ion Formula  | m/z err [ppm] | Mean err [ppm] | rdb  | N-Rule | e <sup>-</sup> | Conf | mSigma | Std I | Std  | Mean m/z | Std I | VarNorm | Std m/z | Diff | Std  | Comb | Dev  |
| 1200.556530 1 C84H78N4Ni | 1200.557443   | 0.8            | -0.5 | 48.0   | ok             | odd  | 19.2   | 13.9  | n.a. | n.a.     | n.a.  | n.a.    | n.a.    | n.a. | n.a. | n.a. | n.a. |

**Figure S15.** HRMS of compound **11** (top: experimental MS, bottom: simulation)

## Analytical chiral HPLC separation for compound 11

- The sample is dissolved in dichloromethane, injected on the chiral column, and detected with a UV detector at 254 nm and a circular dichroism detector at 254 nm. The flow-rate is 1 mL/min.

| Column         | Mobile Phase                      | t1       | k1   | t2       | k2   | $\alpha$ | Rs   |
|----------------|-----------------------------------|----------|------|----------|------|----------|------|
| (S,S)-Whelk-O1 | Heptane / dichloromethane (80/20) | 6.25 (-) | 1.12 | 8.40 (+) | 1.85 | 1.65     | 5.15 |

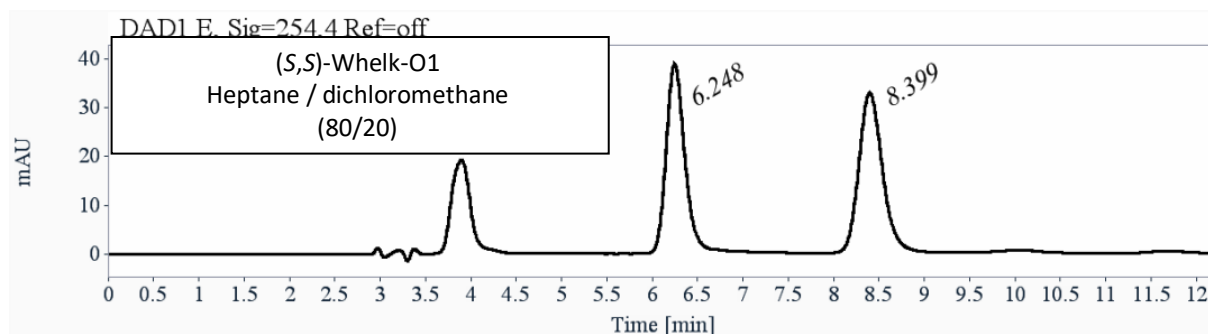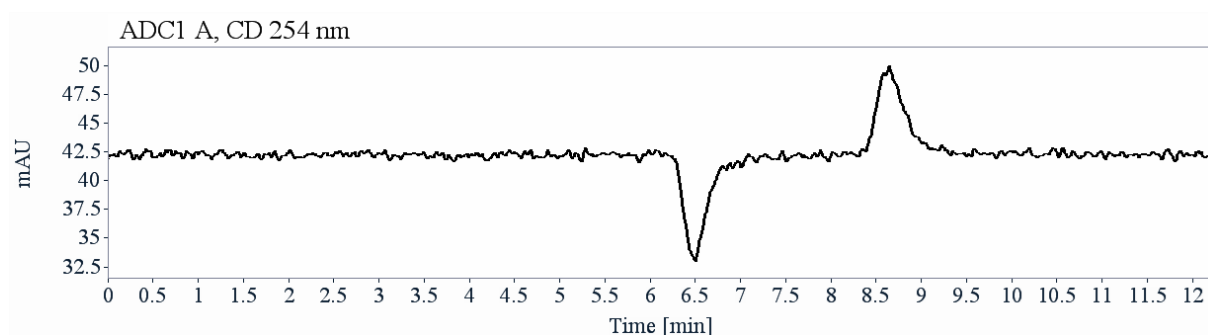

| RT [min] | Area | Area%  | Capacity Factor | Enantioselectivity | Resolution (USP) |
|----------|------|--------|-----------------|--------------------|------------------|
| 6.25     | 575  | 49.14  | 1.12            |                    |                  |
| 8.40     | 595  | 50.86  | 1.85            | 1.65               | 5.15             |
| Sum      | 1170 | 100.00 |                 |                    |                  |

## Preparative separation for compound 11

- Sample preparation: About 7.2 mg of compound **11** are dissolved in 1.8 mL of a mixture of dichloromethane and hexane (50/50).
- Chromatographic conditions: (*S,S*)-Whelk-O1 (250 x 10 mm), hexane / dichloromethane (80/20) as mobile phase, flow-rate = 5 mL/min, UV detection at 254 nm.
- Injections (stacked): 18 times 100  $\mu$ L, every 9 minutes.
- First fraction: 1.6 mg of the first eluted enantiomer with ee > 97.5 %

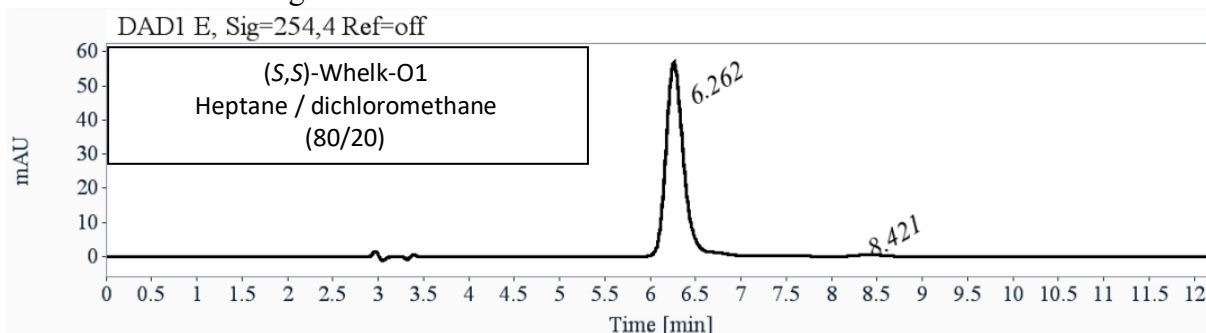

| RT [min] | Area | Area%  |
|----------|------|--------|
| 6.26     | 792  | 98.95  |
| 8.42     | 8    | 1.05   |
| Sum      | 800  | 100.00 |

- Second fraction: 1.7 mg of the second eluted enantiomer with ee > 99.5 %

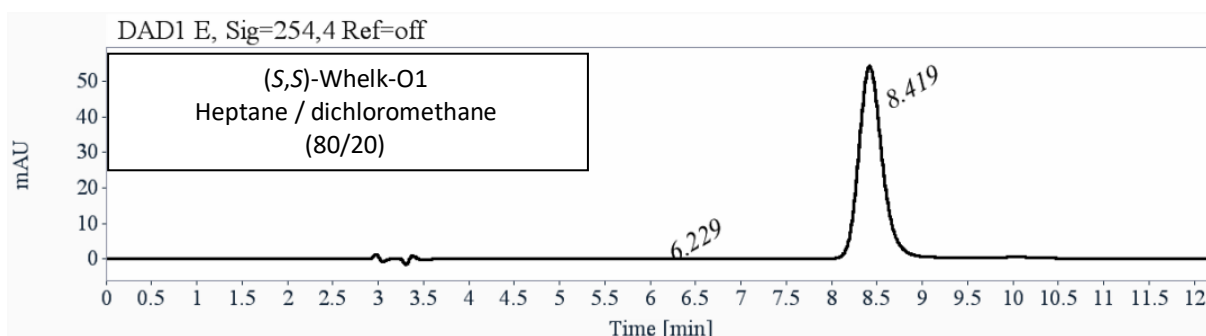

| RT [min] | Area | Area%  |
|----------|------|--------|
| 6.23     | 1    | 0.06   |
| 8.42     | 979  | 99.94  |
| Sum      | 979  | 100.00 |

Intermediate: 3.9 mg

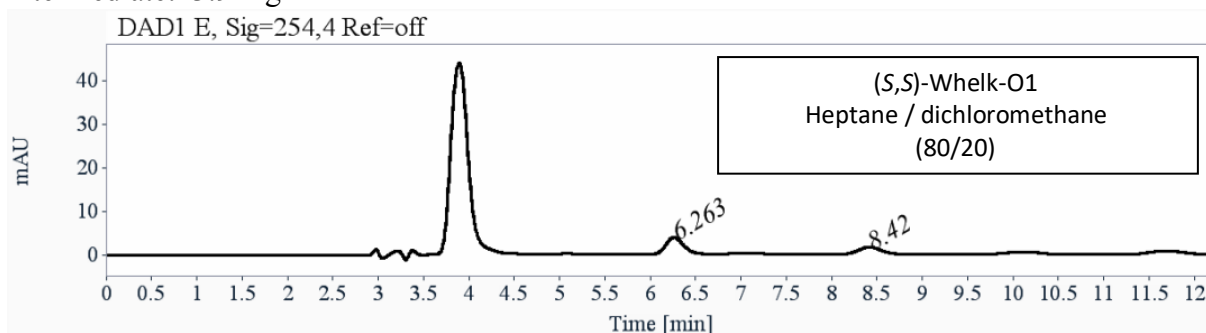

## Electronic Circular Dichroism - compound 11

ECD and UV spectra were measured on a JASCO J-815 spectrometer equipped with a JASCO Peltier cell holder PTC-423 to maintain the temperature at  $25.0 \pm 0.2^\circ\text{C}$ . A CD quartz cell of 1 mm of optical pathlength was used. The CD spectrometer was purged with nitrogen before recording each spectrum, which was baseline subtracted.

The baseline was always measured for the same solvent and in the same cell as the samples.

The spectra are presented without smoothing and further data processing.

Compound **11**, first eluted on (*S,S*)-Whelk-O1: green solid line, concentration =  $0.073 \text{ mmol.L}^{-1}$  in dichloromethane.

Compound **11**, second eluted on (*S,S*)-Whelk-O1: red dotted line, concentration =  $0.076 \text{ mmol.L}^{-1}$  in dichloromethane.

Acquisition parameters: 0.1 nm as intervals, scanning speed 50 nm/min, band width 2 nm, and 3 accumulations per sample.

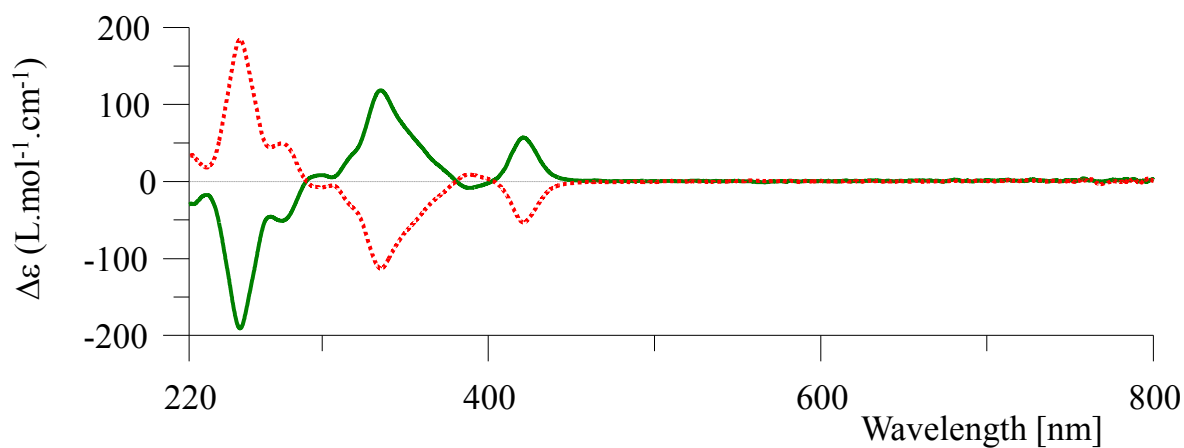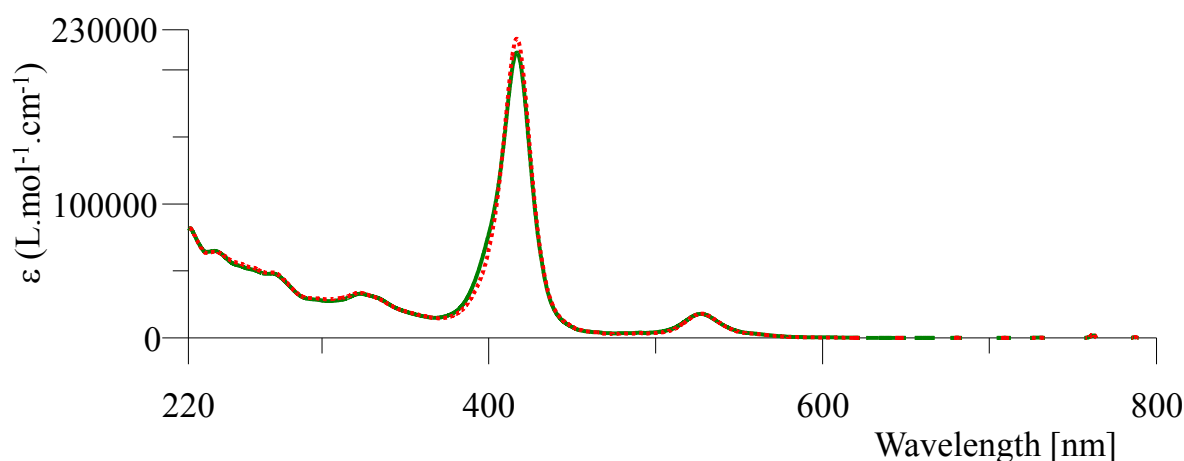

## NMR and MS data of compound 12

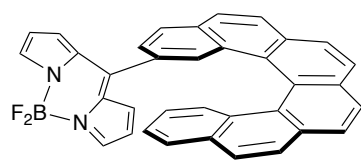

Chemical Formula:  $C_{35}H_{21}BF_2N_2$   
Molecular Weight: 518,37

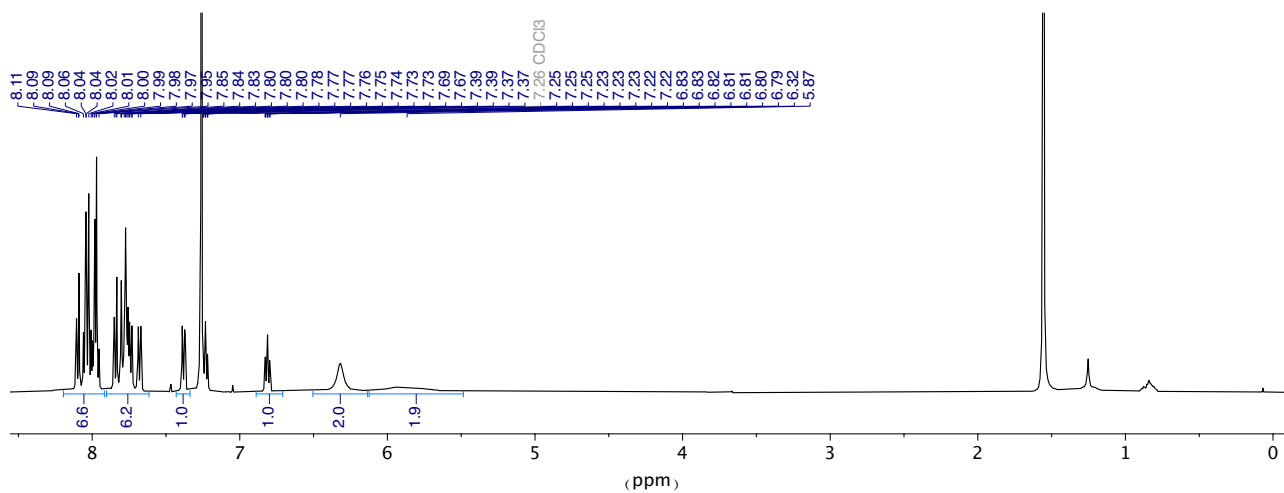

**Figure S16:**  $^1H$  NMR spectrum of compound 12 in  $CDCl_3$  at 298 K (500 MHz).

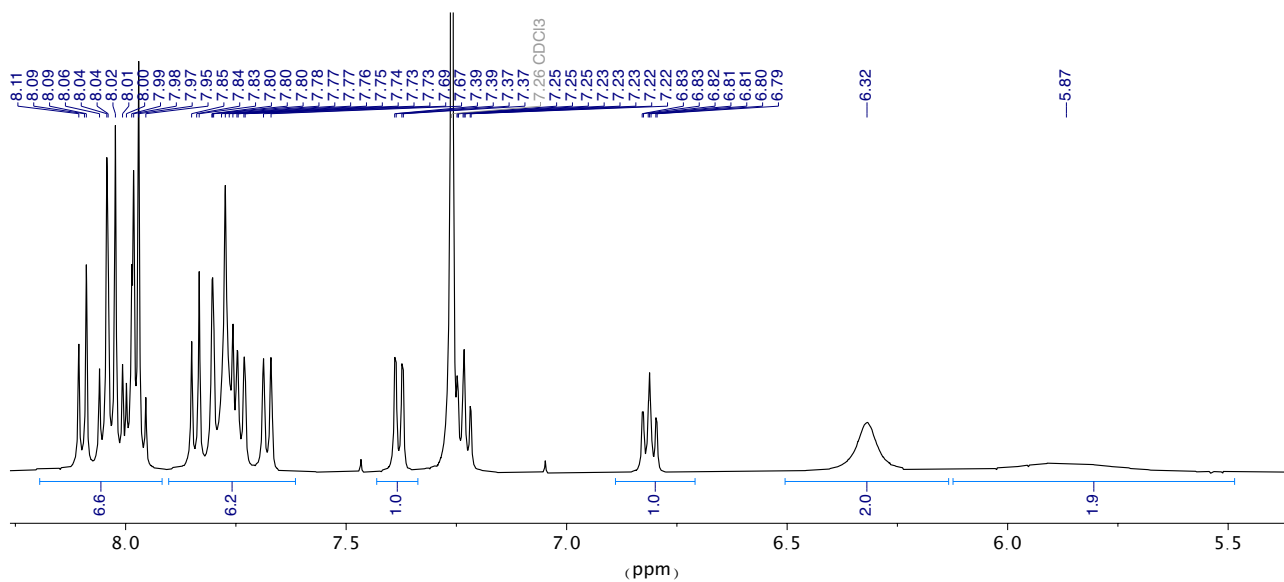

**Figure S17:**  $^1H$  NMR spectrum (aromatic area) of compound 12 in  $CDCl_3$  at 298 K (500 MHz).



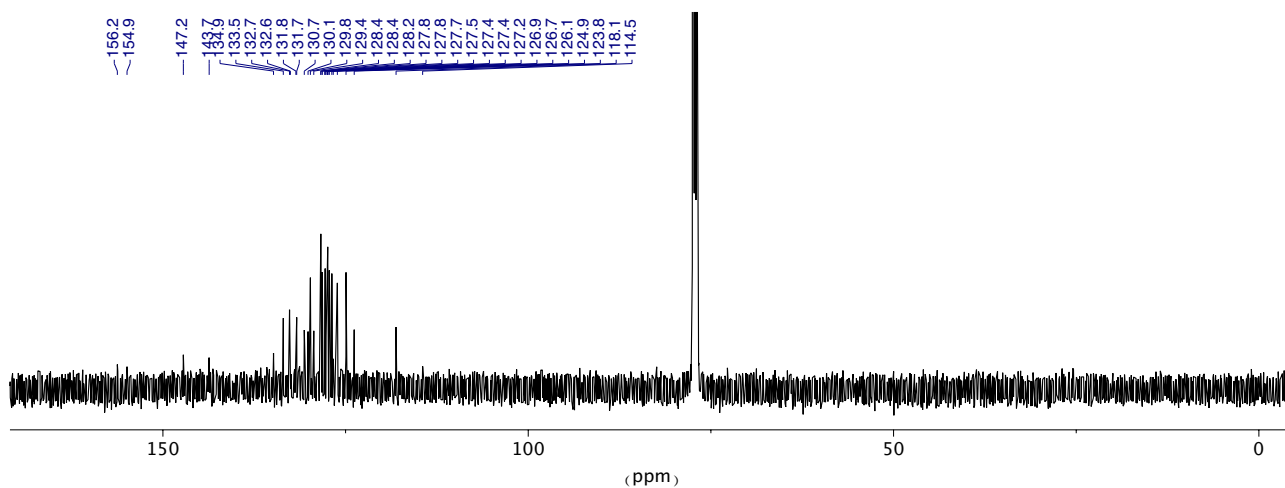

**Figure S18:**  $^{13}\text{C}$  NMR spectrum of compound **12** in  $\text{CDCl}_3$  at 298 K (126 MHz).

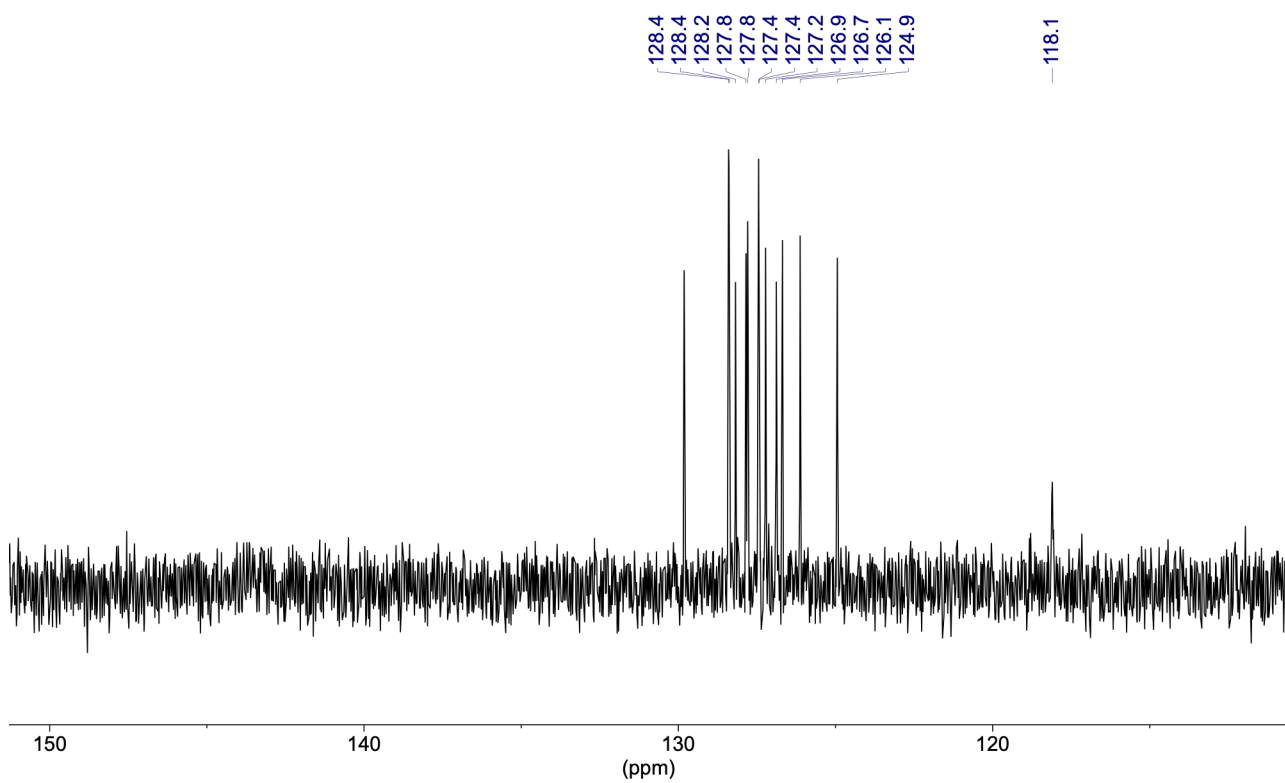

**Figure S19:**  $^{13}\text{C}$  NMR DEPT spectrum of compound **12** in  $\text{CDCl}_3$  at 298 K (126 MHz).

**Acquisition Parameter**

|              |          |            |        |           |           |                    |           |
|--------------|----------|------------|--------|-----------|-----------|--------------------|-----------|
| Source Type  | ESI      | Capillary  | 4500 V | Nebulizer | 0.3 Bar   | Set Hexapole RF    | 330.0 Vpp |
| Ion Polarity | Positive | Dry Heater | 200 °C | Dry Gas   | 3.0 l/min | Set Capillary Exit | 150.0 V   |

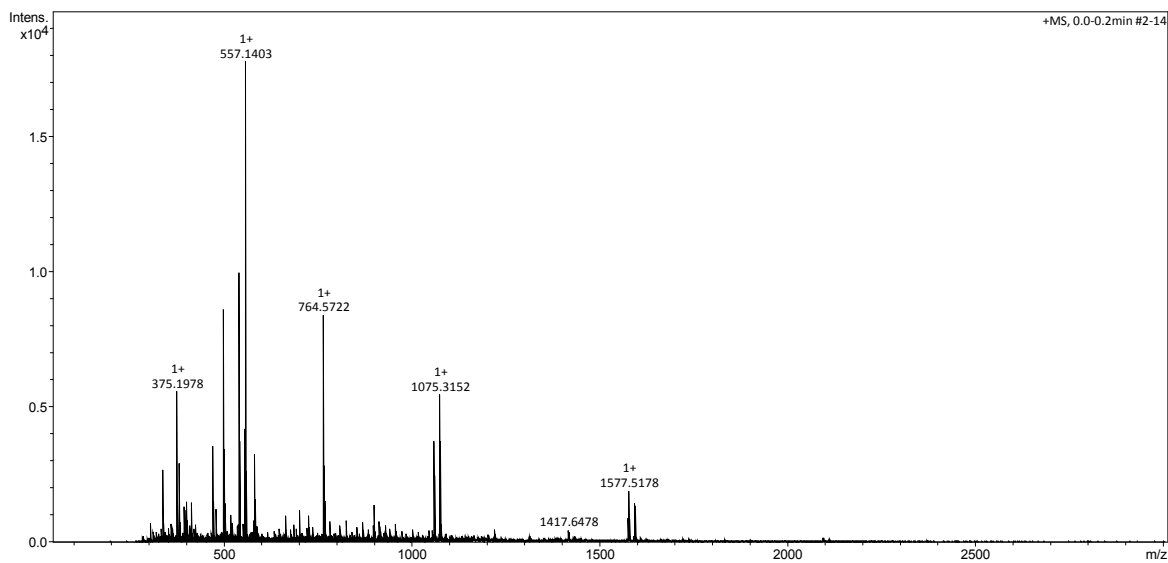

**Figure S20:** HRMS (ESI positive) of compound **12**. (The "molecular peak" at 557.14 correspond to Compound **12** + K<sup>+</sup>).

**Acquisition Parameter**

|             |          |              |          |                    |          |
|-------------|----------|--------------|----------|--------------------|----------|
| Source Type | ESI      | Ion Polarity | Positive | Set Corrector Fill | 48.2 V   |
| n/a         | n/a      | n/a          | n/a      | n/a                | n/a      |
| Scan Begin  | 50 m/z   | n/a          | n/a      | Set Reflector      | 1800.0 V |
| Scan End    | 3000 m/z | n/a          | n/a      | Set Flight Tube    | 8600.0 V |
|             |          | n/a          | n/a      | Set Detector TOF   | 2021.6 V |

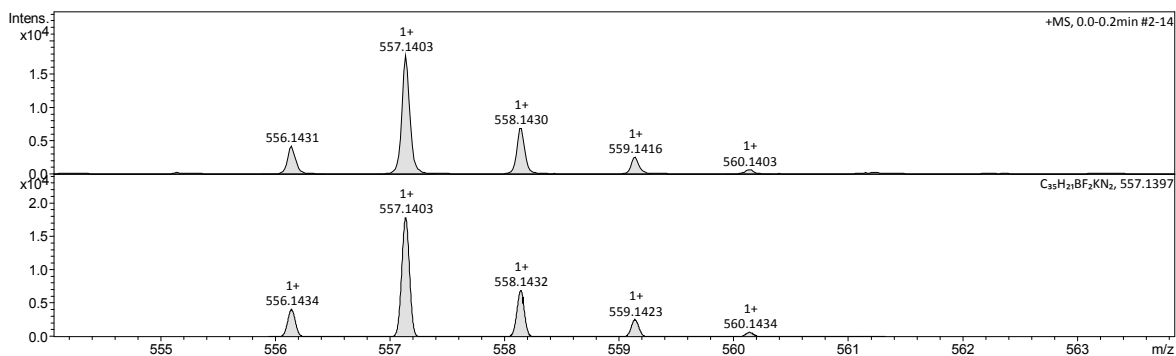

| Meas. m/z # | Ion Formula    | m/z err [ppm] | Mean err [ppm] | rdb | N-Rule | e <sup>-</sup> | Conf | mSigma | Std | Std  | Mean m/z | Std  | Var  | Norm | Std  | m/z  | Diff | Std  | Comb | Dev  |
|-------------|----------------|---------------|----------------|-----|--------|----------------|------|--------|-----|------|----------|------|------|------|------|------|------|------|------|------|
| 557.140271  | 1 C35H21BF2KN2 | 557.139744    | 0.1            | 1.2 | 25.5   | ok             | even | 5.2    | 8.1 | n.a. | n.a.     | n.a. | n.a. | n.a. | n.a. | n.a. | n.a. | n.a. | n.a. | n.a. |

**Figure S21.** HRMS of compound **12** (top: experimental MS, bottom: simulation)

## Analytical chiral HPLC separation for compound 12

- The sample is dissolved in dichloromethane, injected on the chiral column, and detected with a UV detector at 254 nm and a circular dichroism detector at 254 nm. The flow-rate is 1 mL/min.

| Column       | Mobile Phase                                  | t1       | k1   | t2       | k2   | $\alpha$ | Rs   |
|--------------|-----------------------------------------------|----------|------|----------|------|----------|------|
| Chiralpak IG | Heptane / 2-PrOH / dichloromethane (80/10/10) | 8.42 (-) | 1.85 | 9.55 (+) | 2.24 | 1.21     | 2.74 |

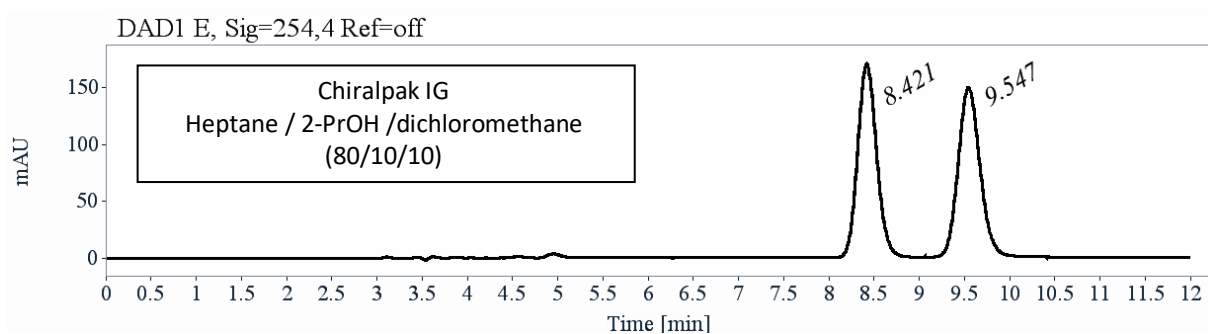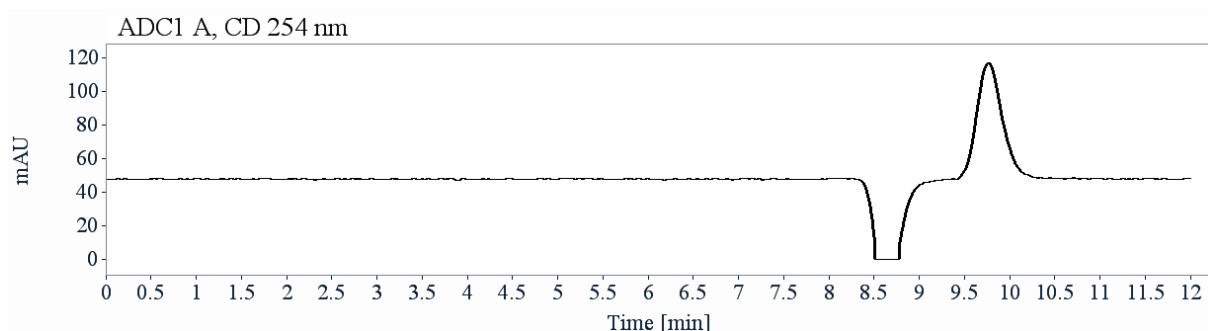

| RT [min] | Area | Area%  | Capacity Factor | Enantioselectivity | Resolution (USP) |
|----------|------|--------|-----------------|--------------------|------------------|
| 8.42     | 2481 | 49.71  | 1.85            |                    |                  |
| 9.55     | 2510 | 50.29  | 2.24            | 1.21               | 2.74             |
| Sum      | 4991 | 100.00 |                 |                    |                  |

### Preparative separation for compound 12

- Sample preparation: About 4.9 mg of compound **VS458** are dissolved in 3.5 mL of a mixture of dichloromethane and hexane (70/30).
- Chromatographic conditions: Chiralpak IG (250 x 10 mm), hexane / 2-PrOH / dichloromethane (80/10/10) as mobile phase, flow-rate = 5 mL/min, UV detection at 254 nm.
- Injections (stacked): 43 times 80  $\mu$ L, every 3 minutes.

- First fraction: 1.5 mg of the first eluted enantiomer with ee > 99.5 %

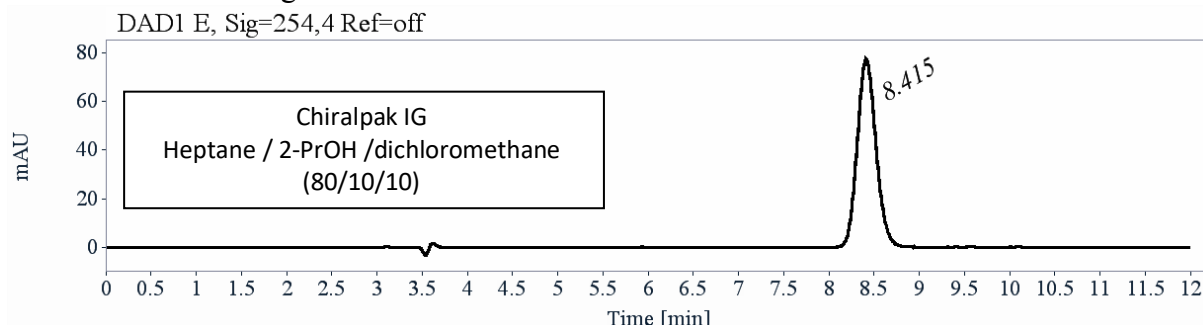

| RT [min] | Area | Area%  |
|----------|------|--------|
| 8.41     | 1123 | 100.00 |
| Sum      | 1123 | 100.00 |

- Second fraction: 1.7 mg of the second eluted enantiomer with ee > 99.5 %

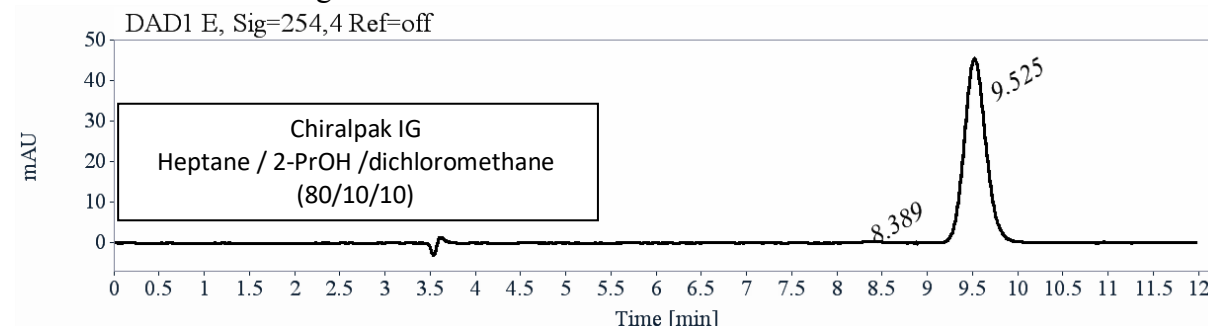

| RT [min] | Area | Area%  |
|----------|------|--------|
| 8.39     | 1    | 0.15   |
| 9.53     | 765  | 99.85  |
| Sum      | 766  | 100.00 |

Intermediate: 1.2 mg

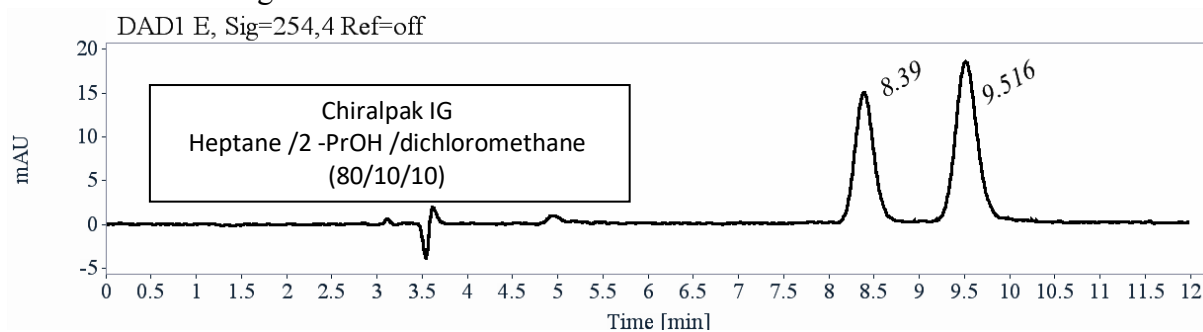

## Electronic Circular Dichroism - compound 12

ECD and UV spectra were measured on a JASCO J-815 spectrometer equipped with a JASCO Peltier cell holder PTC-423 to maintain the temperature at  $25.0 \pm 0.2^\circ\text{C}$ . A CD quartz cell of 1 mm of optical pathlength was used. The CD spectrometer was purged with nitrogen before recording each spectrum, which was baseline subtracted.

The baseline was always measured for the same solvent and in the same cell as the samples.

The spectra are presented without smoothing and further data processing.

Compound **12**, first eluted on Chiralpak IG: green solid line, concentration =  $0.210 \text{ mmol.L}^{-1}$  in acetonitrile.

Compound **12**, second eluted on Chiralpak IG: red dotted line, concentration =  $0.175 \text{ mmol.L}^{-1}$  in acetonitrile.

Acquisition parameters: 0.1 nm as intervals, scanning speed 50 nm/min, band width 2 nm, and 3 accumulations per sample.

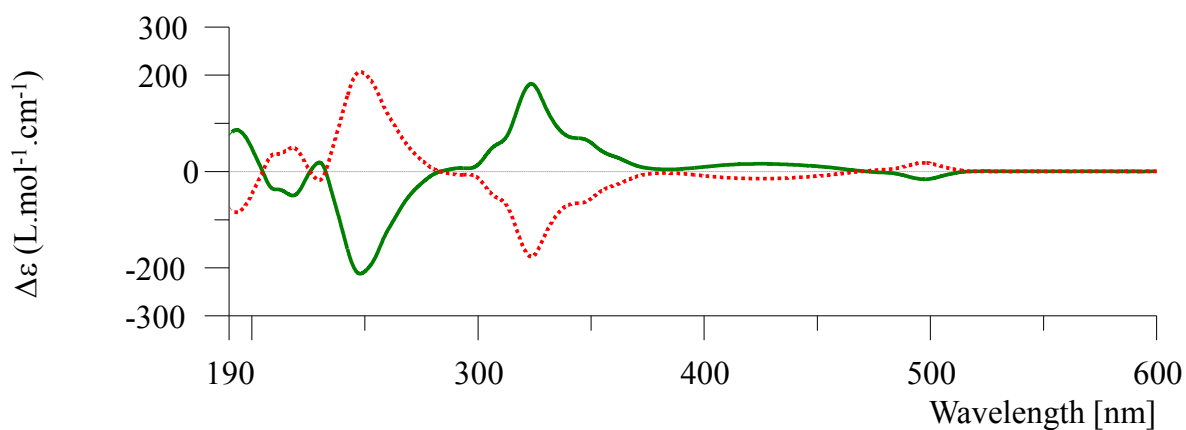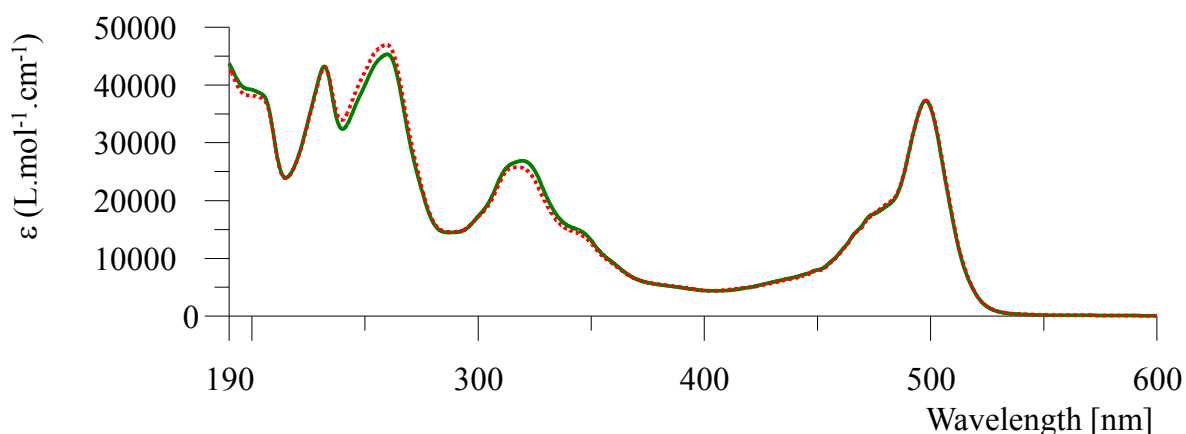

## NMR and MS data of compound 13

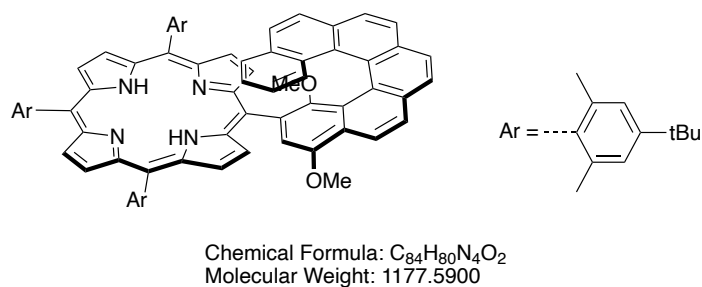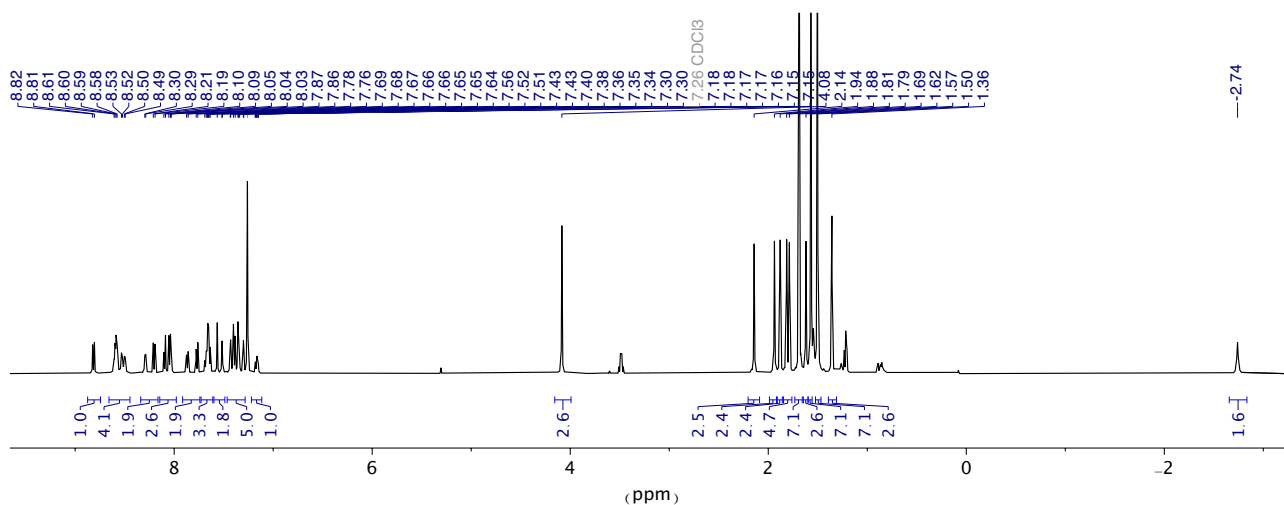

**Figure S22:**  $^1H$  NMR spectrum of compound **13** in  $CDCl_3$  at 298 K, residual ether present (500 MHz).

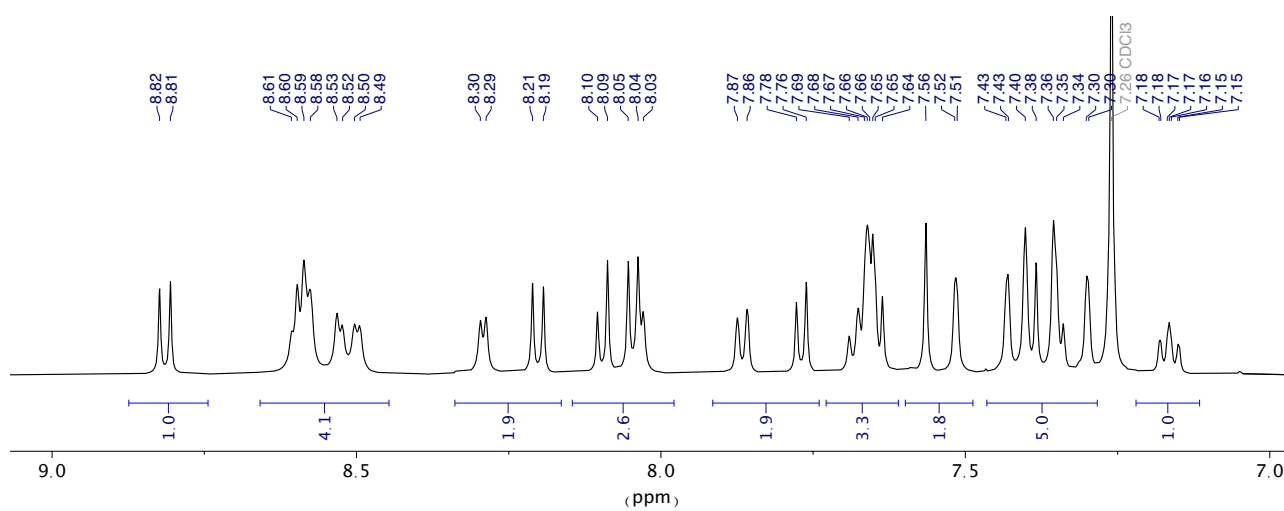

**Figure S23:**  $^1H$  NMR spectrum (aromatic area) of compound **13** in  $CDCl_3$  at 298 K (500 MHz).

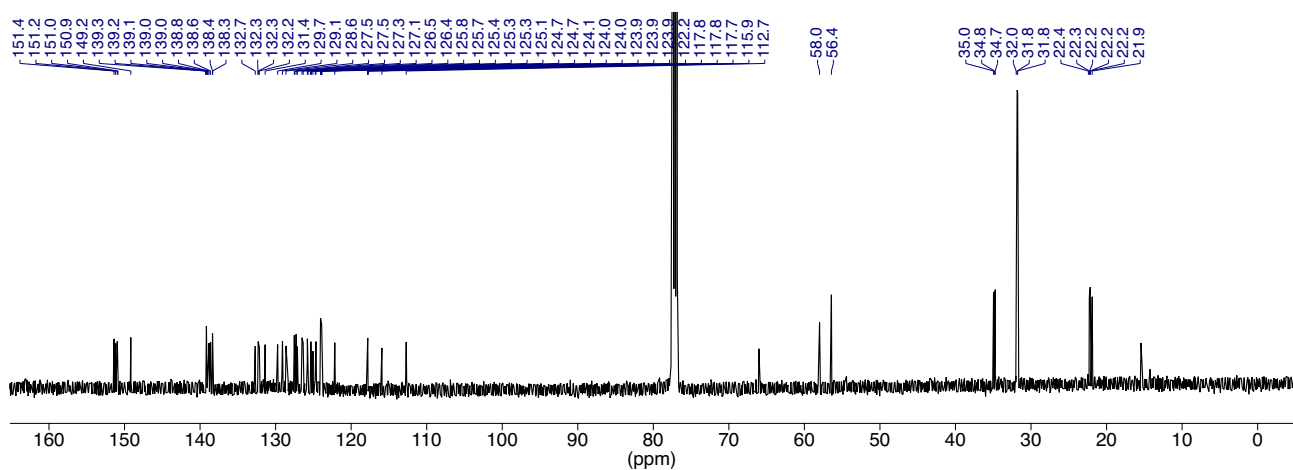

**Figure S24:**  $^{13}\text{C}$  NMR spectrum of compound **13** in  $\text{CDCl}_3$  at 298 K (126 MHz), residual ether present.

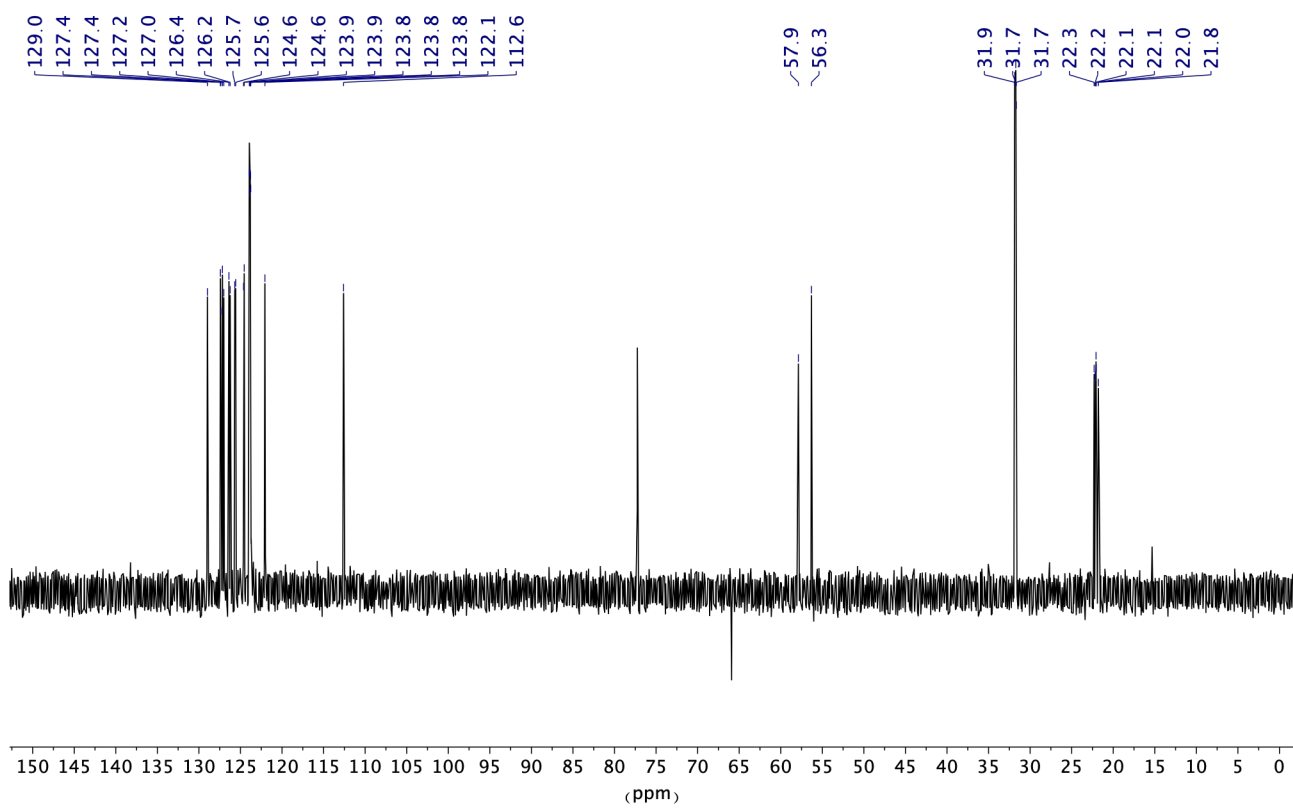

**Figure S25:**  $^{13}\text{C}$  NMR DEPT spectrum of compound **13** in  $\text{CDCl}_3$  at 298 K (126 MHz), residual ether present.

**Acquisition Parameter**

|              |          |            |        |           |           |                    |           |
|--------------|----------|------------|--------|-----------|-----------|--------------------|-----------|
| Source Type  | ESI      | Capillary  | 4500 V | Nebulizer | 0.3 Bar   | Set Hexapole RF    | 330.0 Vpp |
| Ion Polarity | Positive | Dry Heater | 200 °C | Dry Gas   | 3.0 l/min | Set Capillary Exit | 250.0 V   |

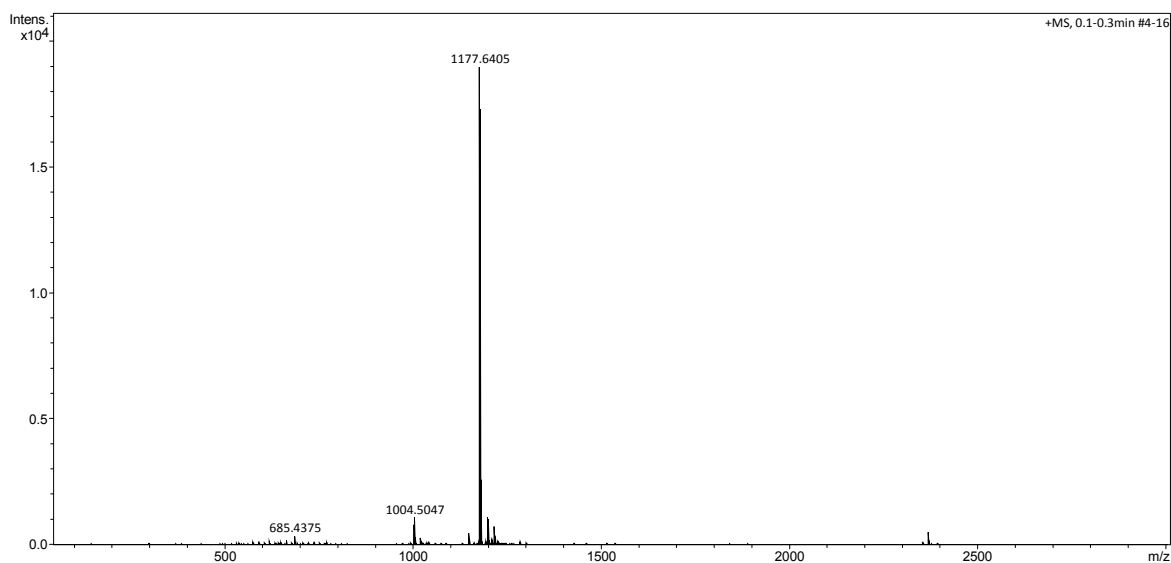**Figure S26.** HRMS of compound **13**.**Acquisition Parameter**

|             |          |              |          |                    |          |
|-------------|----------|--------------|----------|--------------------|----------|
| Source Type | ESI      | Ion Polarity | Positive | Set Corrector Fill | 52.4 V   |
| n/a         | n/a      | n/a          | n/a      | n/a                | n/a      |
| Scan Begin  | 50 m/z   | n/a          | n/a      | Set Reflector      | 1800.0 V |
| Scan End    | 3000 m/z | n/a          | n/a      | Set Flight Tube    | 8600.0 V |
|             |          |              |          | Set Detector TOF   | 1985.0 V |

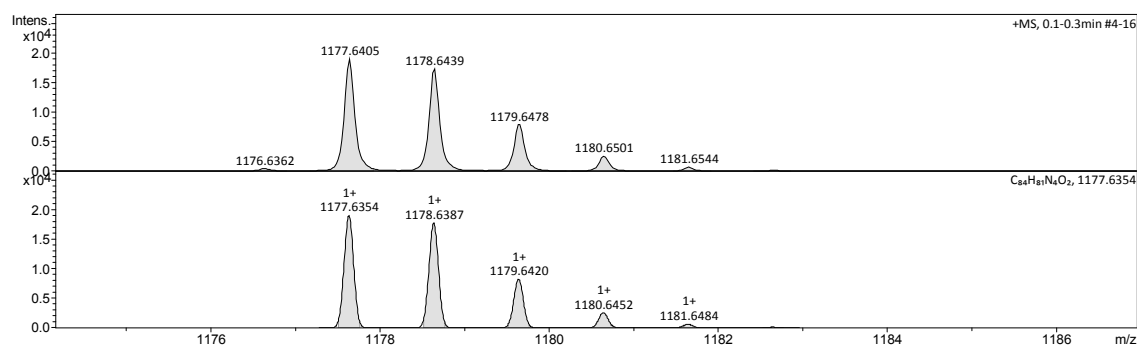

| Meas. m/z # Ion Formula  | m/z err [ppm] | Mean err [ppm] | rdb  | N-Rule | e <sup>-</sup> Conf | mSigma | Std | Std Mean | m/z  | Std  | VarNorm | Std m/z | Diff | Std  | Comb | Dev  |
|--------------------------|---------------|----------------|------|--------|---------------------|--------|-----|----------|------|------|---------|---------|------|------|------|------|
| 1177.640480 1 C84H81NaO2 | 1177.635404   | -4.3           | -4.5 | 46.5   | ok even             | 13.4   | 9.0 | n.a.     | n.a. | n.a. | n.a.    | n.a.    | n.a. | n.a. | n.a. | n.a. |

**Figure S27.** HRMS of compound **13** (top: experimental MS, bottom: simulation)



### Analytical chiral HPLC separation for compound 13

- The sample is dissolved in dichloromethane, injected on the chiral column, and detected with a UV detector at 254 nm and a circular dichroism detector at 254 nm. The flow-rate is 1 mL/min.

| Column         | Mobile Phase                      | t1       | k1   | t2       | k2   | $\alpha$ | Rs   |
|----------------|-----------------------------------|----------|------|----------|------|----------|------|
| (S,S)-Whelk-O1 | Heptane / dichloromethane (80/20) | 7.25 (-) | 1.46 | 9.12 (+) | 2.09 | 1.43     | 4.27 |

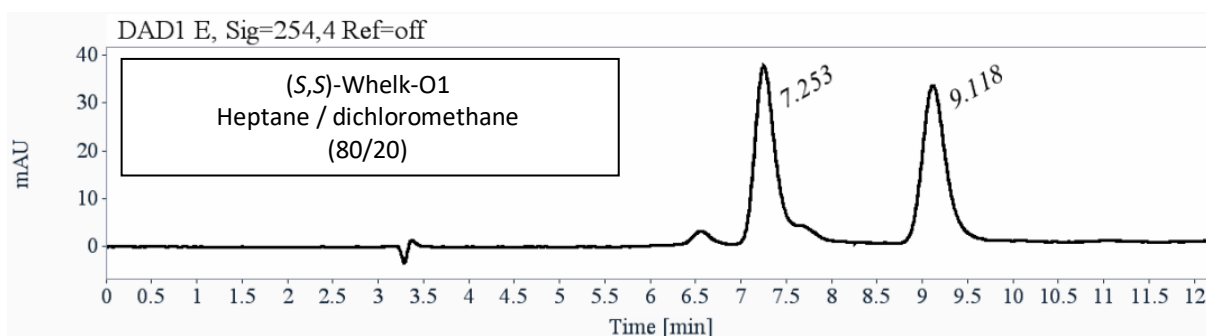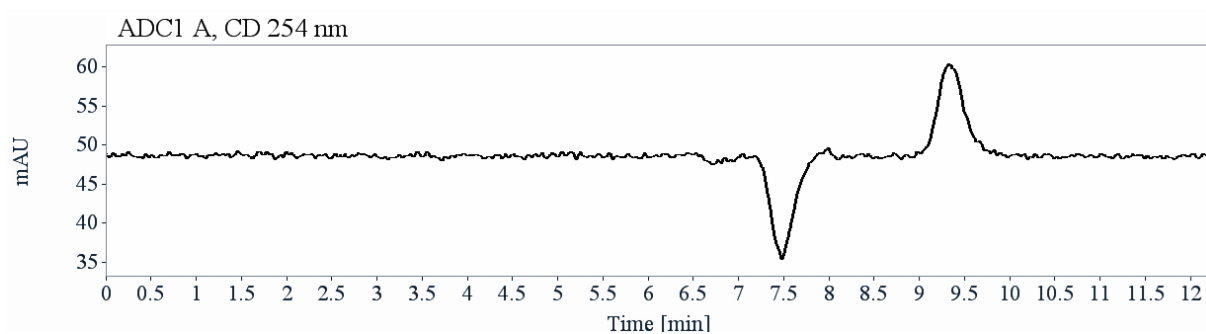

| RT [min] | Area | Area%  | Capacity Factor | Enantioselectivity | Resolution (USP) |
|----------|------|--------|-----------------|--------------------|------------------|
| 7.25     | 653  | 51.93  | 1.46            |                    |                  |
| 9.12     | 605  | 48.07  | 2.09            | 1.43               | 4.27             |
| Sum      | 1258 | 100.00 |                 |                    |                  |

### Preparative separation for compound 13

- Sample preparation: About 2.65 mg of compound **13** are dissolved in 1.8 mL of a mixture of dichloromethane and hexane (50/50).
- Chromatographic conditions: (*S,S*)-Whelk-O1 (250 x 10 mm), hexane / dichloromethane (80/20) as mobile phase, flow-rate = 5 mL/min, UV detection at 254 nm.
- Injections (stacked): 18 times 100  $\mu$ L, every 10.2 minutes.

- First fraction: 0.8 mg of the first eluted enantiomer with ee > 99.5 %

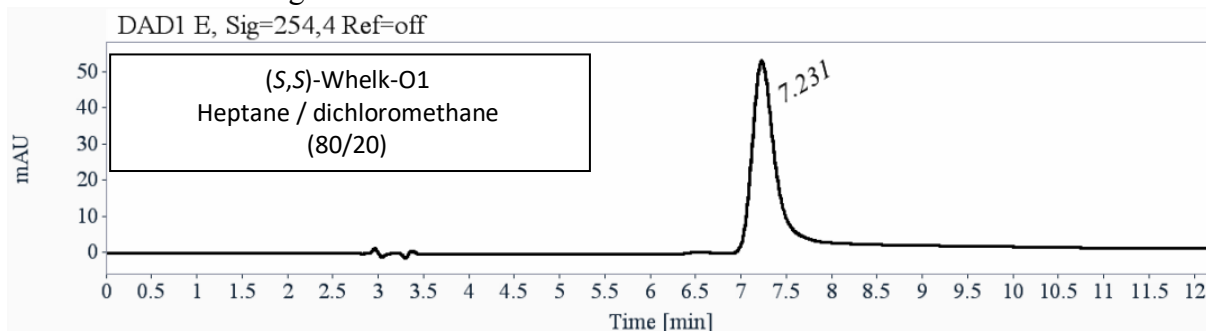

| RT [min] | Area | Area%  |
|----------|------|--------|
| 7.23     | 1258 | 100.00 |
| Sum      | 1258 | 100.00 |

- Second fraction: 0.9 mg of the second eluted enantiomer with ee > 99.5 %

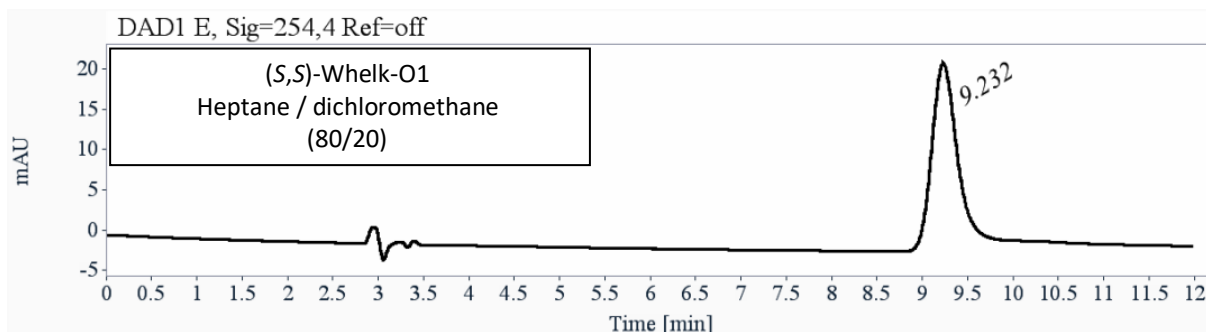

| RT [min] | Area | Area%  |
|----------|------|--------|
| 9.23     | 544  | 100.00 |
| Sum      | 544  | 100.00 |

Intermediate: 0.3 mg

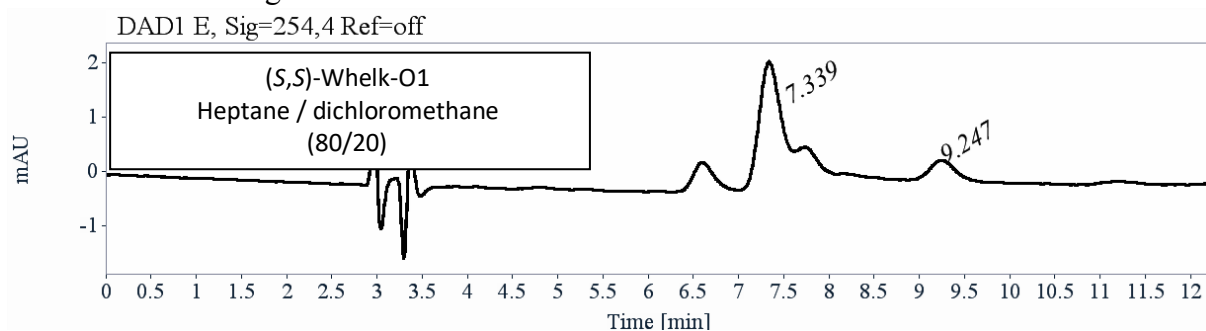

## Electronic Circular Dichroism - compound 13

ECD and UV spectra were measured on a JASCO J-815 spectrometer equipped with a JASCO Peltier cell holder PTC-423 to maintain the temperature at  $25.0 \pm 0.2^\circ\text{C}$ . A CD quartz cell of 1 mm of optical pathlength was used. The CD spectrometer was purged with nitrogen before recording each spectrum, which was baseline subtracted.

The baseline was always measured for the same solvent and in the same cell as the samples.

The spectra are presented without smoothing and further data processing.

Compound **13**, first eluted on (*S,S*)-Whelk-O1: green solid line, concentration =  $0.057 \text{ mmol.L}^{-1}$  in dichloromethane.

Compound **13**, second eluted on (*S,S*)-Whelk-O1: red dotted line, concentration =  $0.039 \text{ mmol.L}^{-1}$  in dichloromethane.

Acquisition parameters: 0.1 nm as intervals, scanning speed 50 nm/min, band width 2 nm, and 3 accumulations per sample.

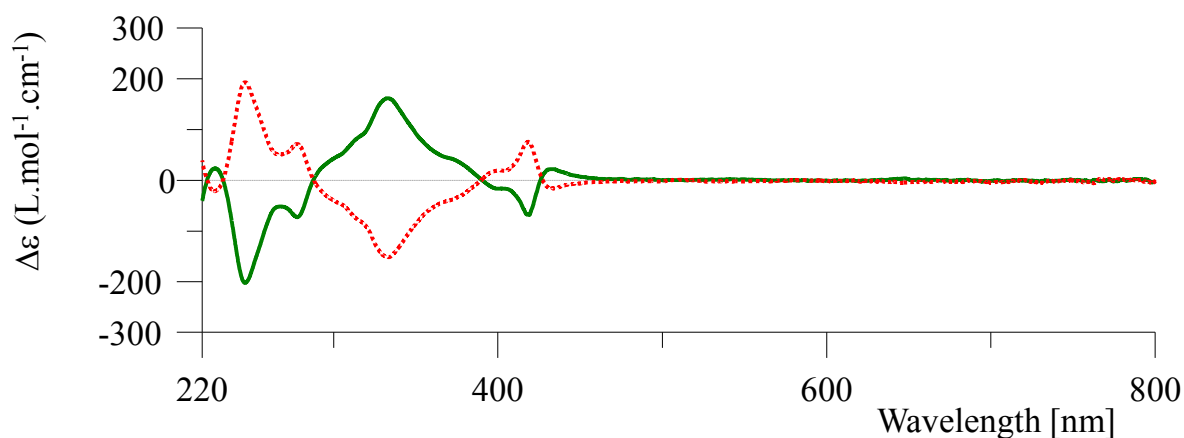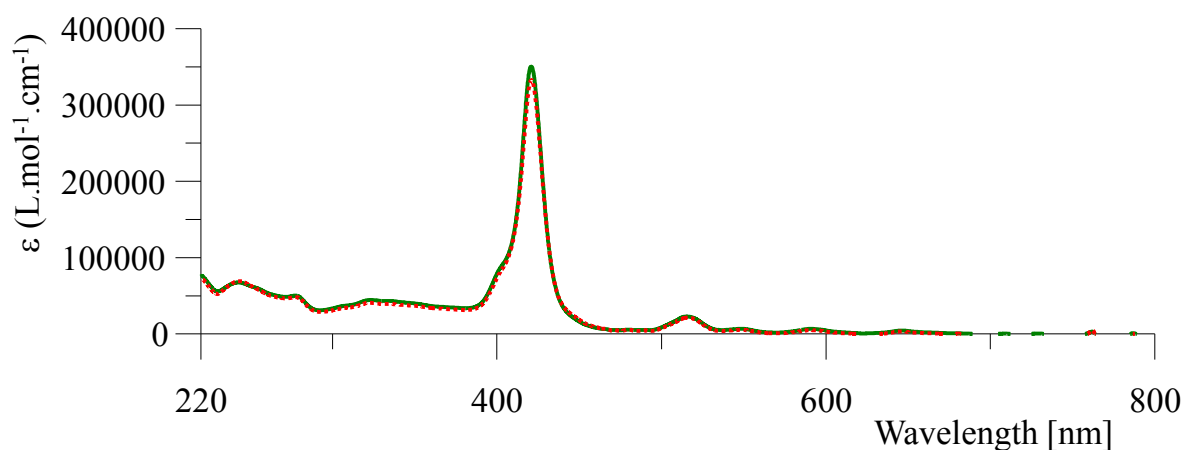

## NMR and MS data of compound 14

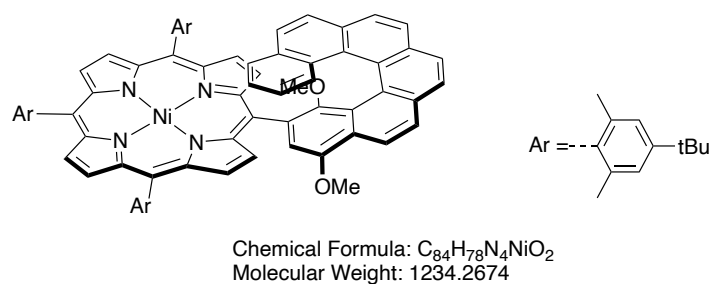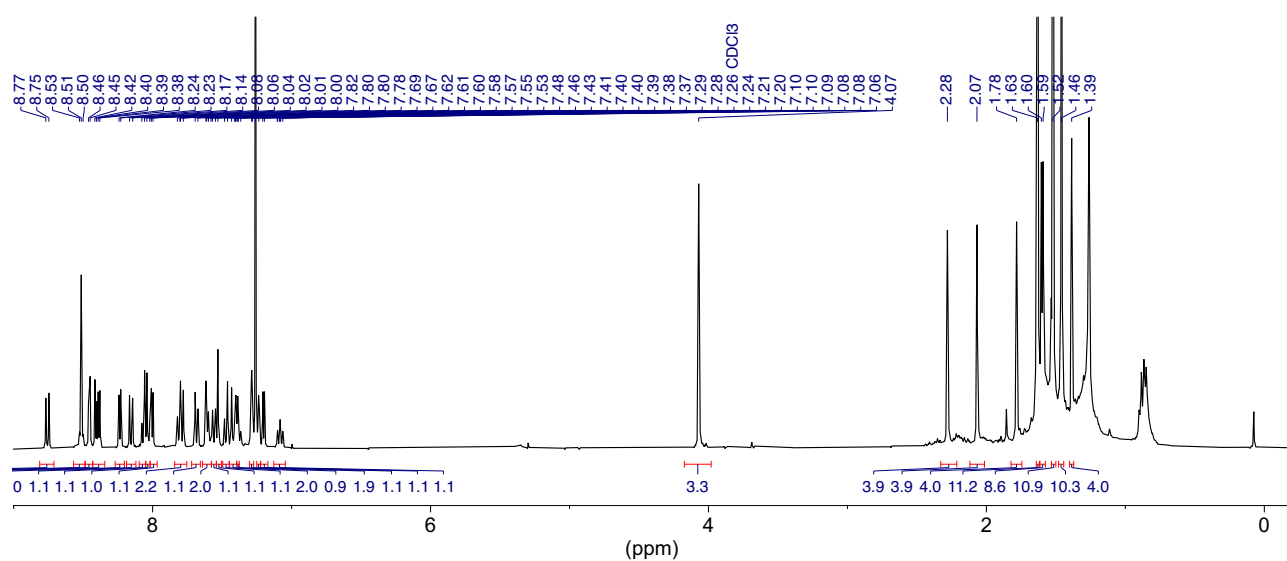

Figure S28:  $^1H$  NMR spectrum of compound 14 in  $CDCl_3$  at 298 K (500 MHz).

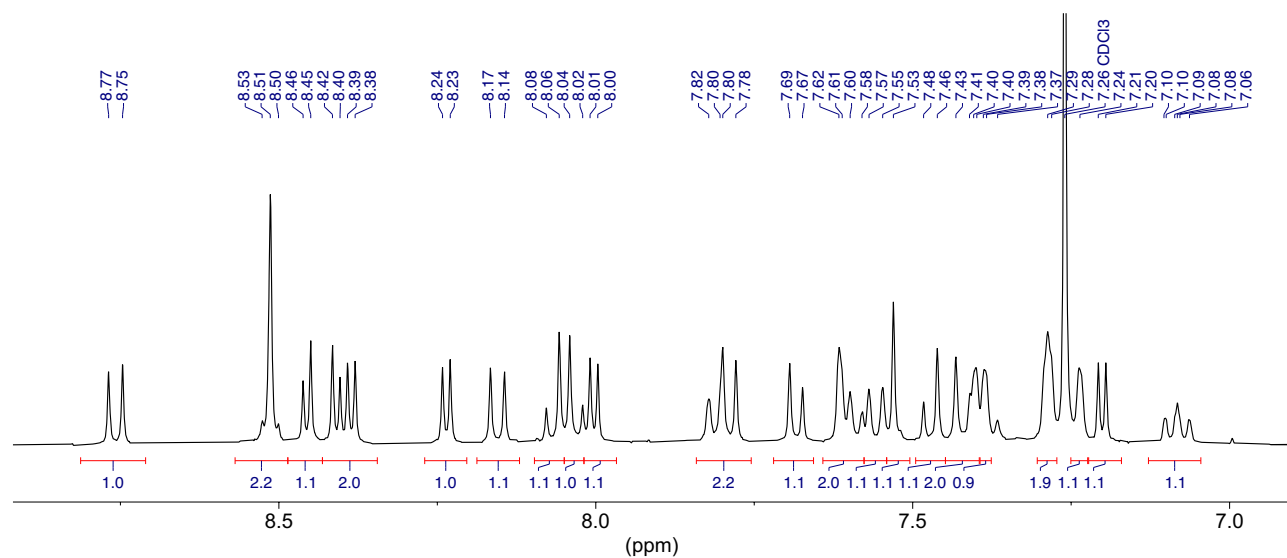

Figure S29:  $^1H$  NMR spectrum (aromatic area) of compound 14 in  $CDCl_3$  at 298 K (500 MHz).

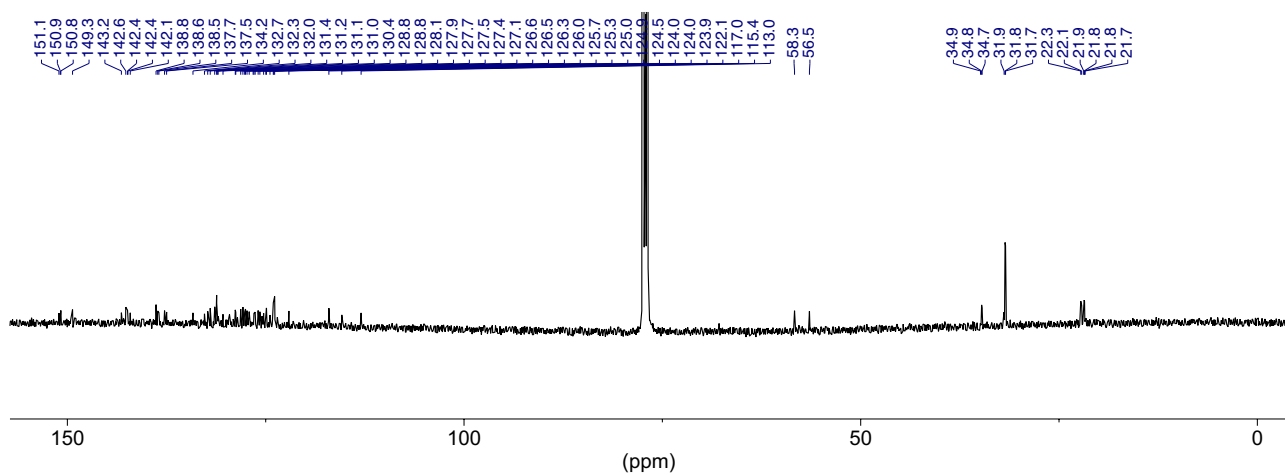

**Figure S30:**  $^{13}\text{C}$  NMR spectrum of compound **14** in  $\text{CDCl}_3$  at 298 K (126 MHz).

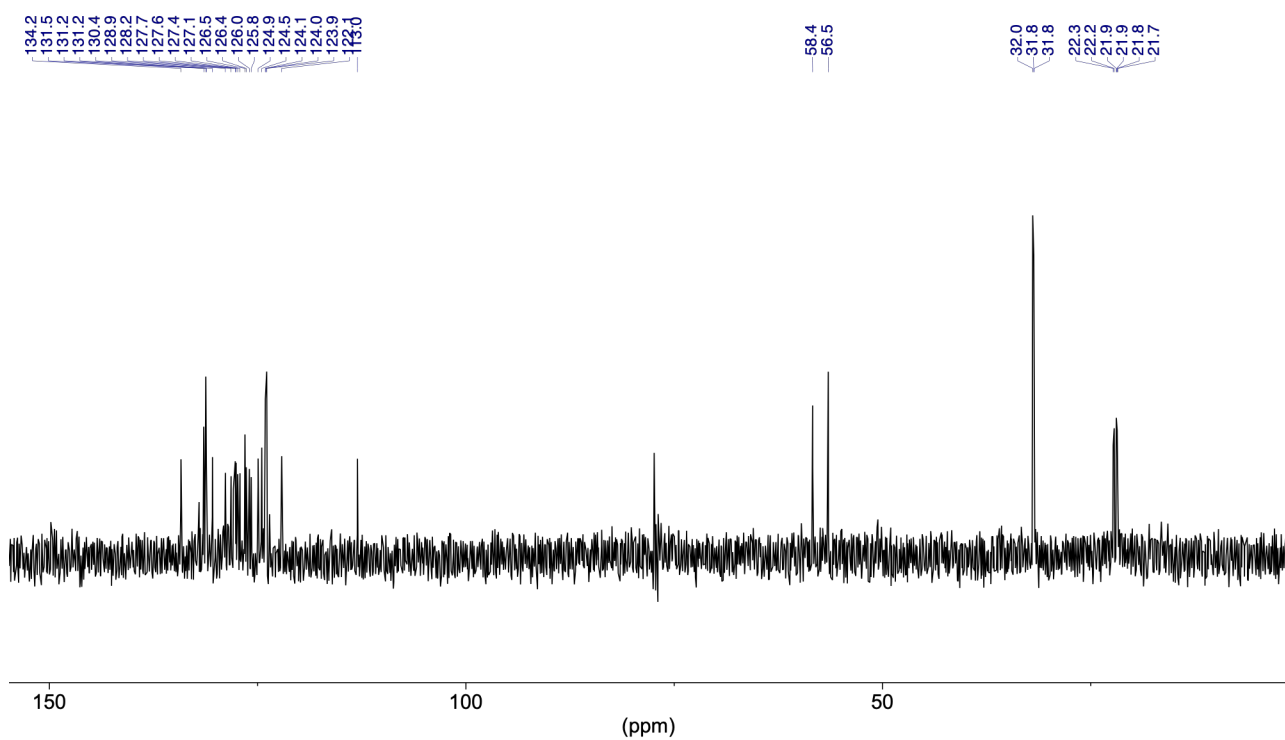

**Figure S31:**  $^{13}\text{C}$  NMR DEPT spectrum of compound **14** in  $\text{CDCl}_3$  at 298 K (126 MHz).

**Acquisition Parameter**

Source Type ESI Capillary 4500 V Nebulizer 0.3 Bar Set Hexapole RF 330.0 Vpp  
 Ion Polarity Positive Dry Heater 200 °C Dry Gas 3.0 l/min Set Capillary Exit 250.0 V

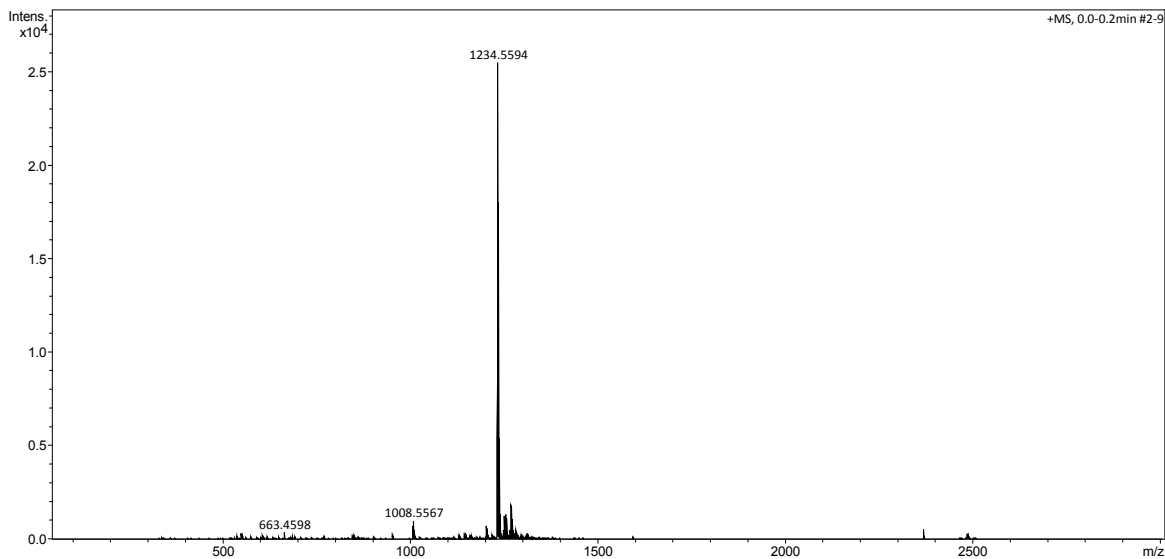

Figure S32. HRMS of compound 14.

**Acquisition Parameter**

Source Type ESI Ion Polarity Positive Set Corrector Fill 52.4 V  
 n/a n/a n/a n/a n/a  
 Scan Begin 50 m/z Set Reflector 1800.0 V  
 Scan End 3000 m/z Set Flight Tube 8600.0 V  
 Set Detector TOF 1985.0 V

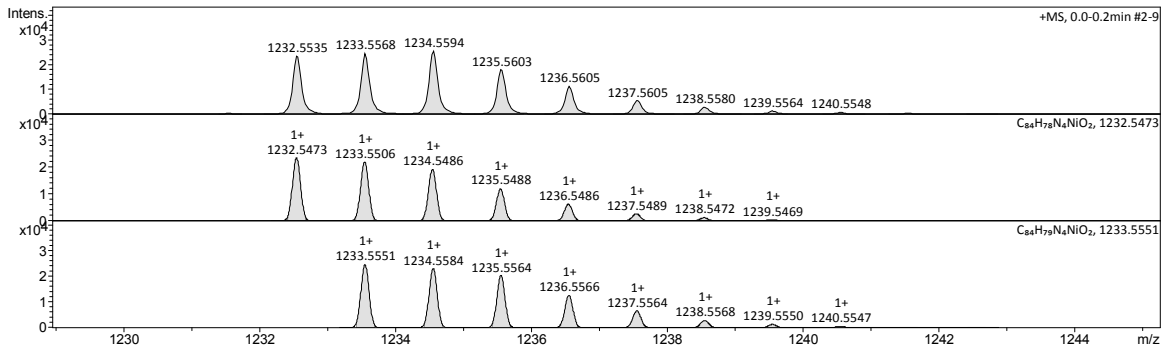

| Meas. m/z # | Ion Formula                                                       | m/z err [ppm] | Mean err [ppm] | rdB  | N-Rule | e <sup>-</sup> Conf | mSigma | Std I | Std  | Mean m/z | Std I | VarNorm | Std m/z | Diff | Std  | Comb | Dev  |
|-------------|-------------------------------------------------------------------|---------------|----------------|------|--------|---------------------|--------|-------|------|----------|-------|---------|---------|------|------|------|------|
| 1232.553509 | 1 C <sub>84</sub> H <sub>78</sub> N <sub>4</sub> NiO <sub>2</sub> | 1232.547272   | -5.1           | -7.4 | 48.0   | ok odd              | 124.3  | 81.3  | n.a. | n.a.     | n.a.  | n.a.    | n.a.    | n.a. | n.a. | n.a. | n.a. |
| 1233.556760 | 1 C <sub>84</sub> H <sub>79</sub> N <sub>4</sub> NiO <sub>2</sub> | 1233.555097   | -1.3           | -1.8 | 47.5   | ok even             | 57.4   | 42.4  | n.a. | n.a.     | n.a.  | n.a.    | n.a.    | n.a. | n.a. | n.a. | n.a. |

Figure S33. HRMS of compound 14 (top: experimental MS, middle and bottom: simulation).

## Analytical chiral HPLC separation for compound 14

- The sample is dissolved in dichloromethane, injected on the chiral column, and detected with a UV detector at 254 nm and a circular dichroism detector at 254 nm. The flow-rate is 1 mL/min.

| Column         | Mobile Phase                      | t1       | k1   | t2       | k2   | $\alpha$ | Rs   |
|----------------|-----------------------------------|----------|------|----------|------|----------|------|
| (S,S)-Whelk-O1 | Heptane / dichloromethane (80/20) | 7.23 (-) | 1.45 | 9.50 (+) | 2.22 | 1.53     | 4.89 |

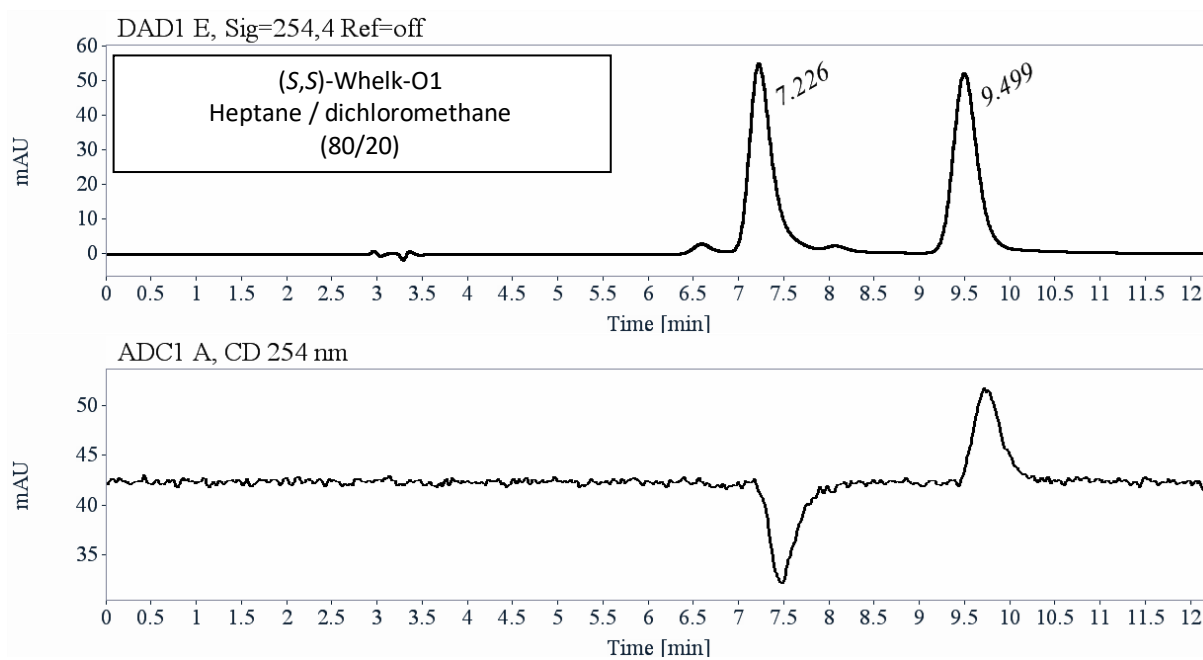

| RT [min] | Area | Area%  | Capacity Factor | Enantioselectivity | Resolution (USP) |
|----------|------|--------|-----------------|--------------------|------------------|
| 7.23     | 986  | 51.05  | 1.45            |                    |                  |
| 9.50     | 945  | 48.95  | 2.22            | 1.53               | 4.89             |
| Sum      | 1931 | 100.00 |                 |                    |                  |

### Preparative separation for compound 14

- Sample preparation: About 2.0 mg of compound **14** are dissolved in 1.8 mL of a mixture of dichloromethane and hexane (50/50).
- Chromatographic conditions: (*S,S*)-Whelk-O1 (250 x 10 mm), hexane / dichloromethane (80/20) as mobile phase, flow-rate = 5 mL/min, UV detection at 254 nm.
- Injections (stacked): 12 times 160  $\mu$ L, every 10.8 minutes.

- First fraction: 0.8 mg of the first eluted enantiomer with ee > 99.5 %

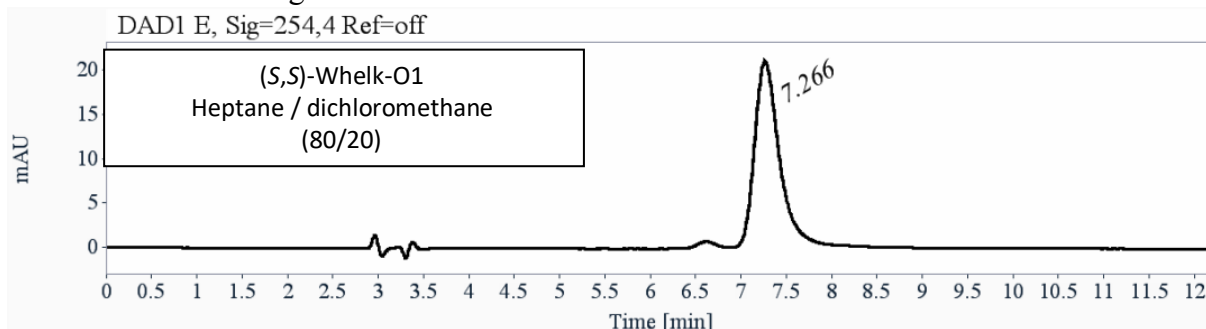

| RT [min] | Area | Area%  |
|----------|------|--------|
| 7.27     | 420  | 100.00 |
| Sum      | 420  | 100.00 |

- Second fraction: 0.9 mg of the second eluted enantiomer with ee > 99.5 %

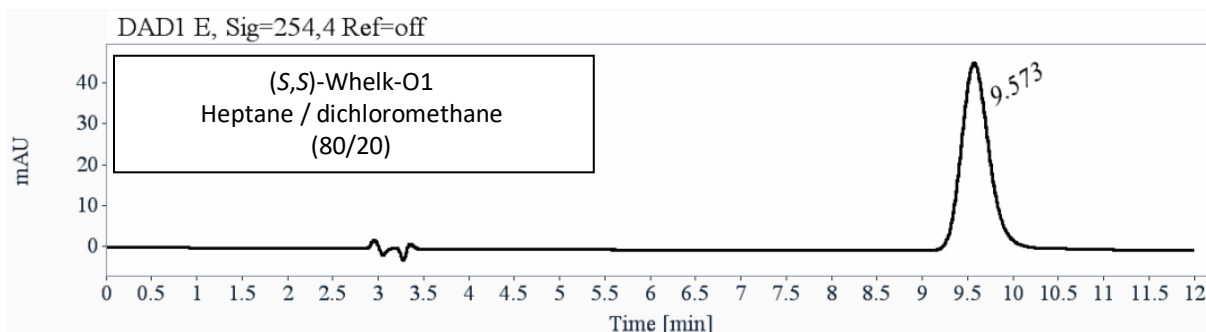

| RT [min] | Area | Area%  |
|----------|------|--------|
| 9.57     | 1010 | 100.00 |
| Sum      | 1010 | 100.00 |

Intermediate: 0.2 mg

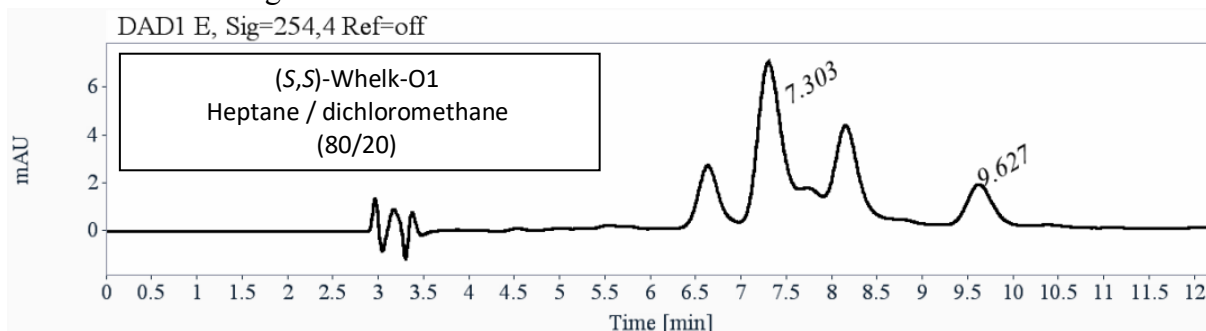



## Electronic Circular Dichroism

ECD and UV spectra were measured on a JASCO J-815 spectrometer equipped with a JASCO Peltier cell holder PTC-423 to maintain the temperature at  $25.0 \pm 0.2^\circ\text{C}$ . A CD quartz cell of 1 mm of optical pathlength was used. The CD spectrometer was purged with nitrogen before recording each spectrum, which was baseline subtracted.

The baseline was always measured for the same solvent and in the same cell as the samples.

The spectra are presented without smoothing and further data processing.

Compound **14**, first eluted on (*S,S*)-Whelk-O1: green solid line, concentration =  $0.074 \text{ mmol.L}^{-1}$  in dichloromethane.

Compound **14**, second eluted on (*S,S*)-Whelk-O1: red dotted line, concentration =  $0.077 \text{ mmol.L}^{-1}$  in dichloromethane.

Acquisition parameters: 0.1 nm as intervals, scanning speed 50 nm/min, band width 2 nm, and 3 accumulations per sample.

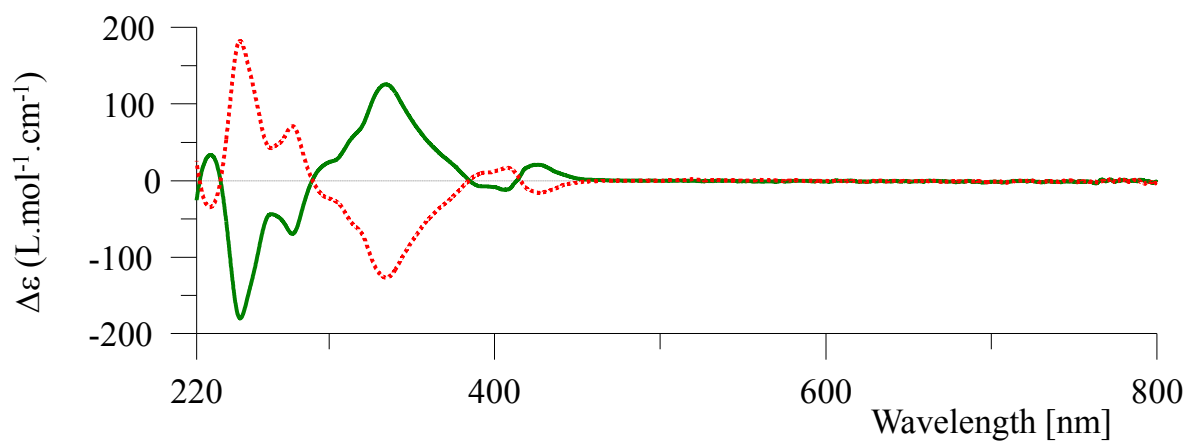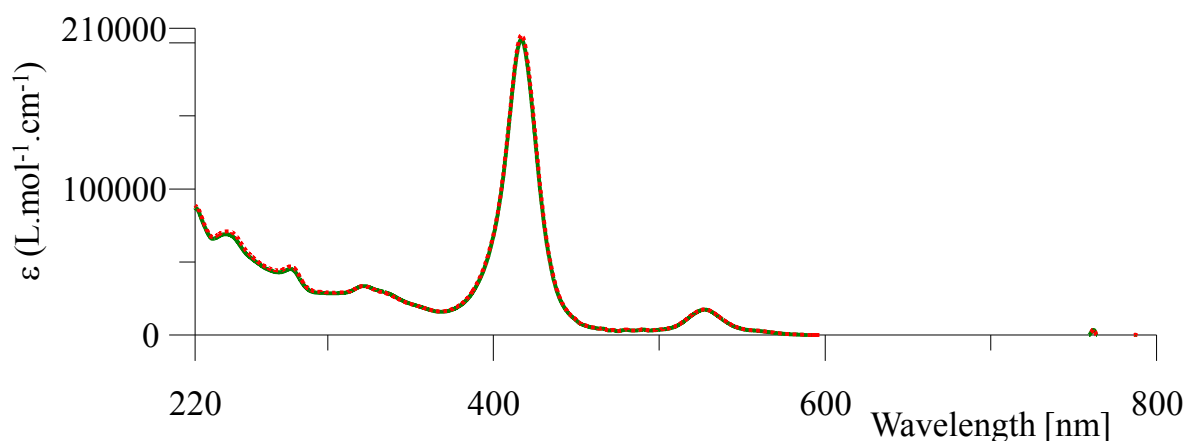

## NMR and MS data of compound 15

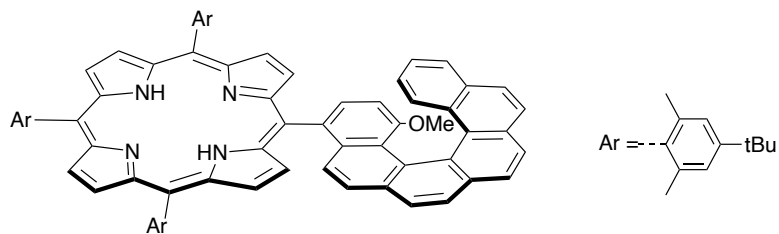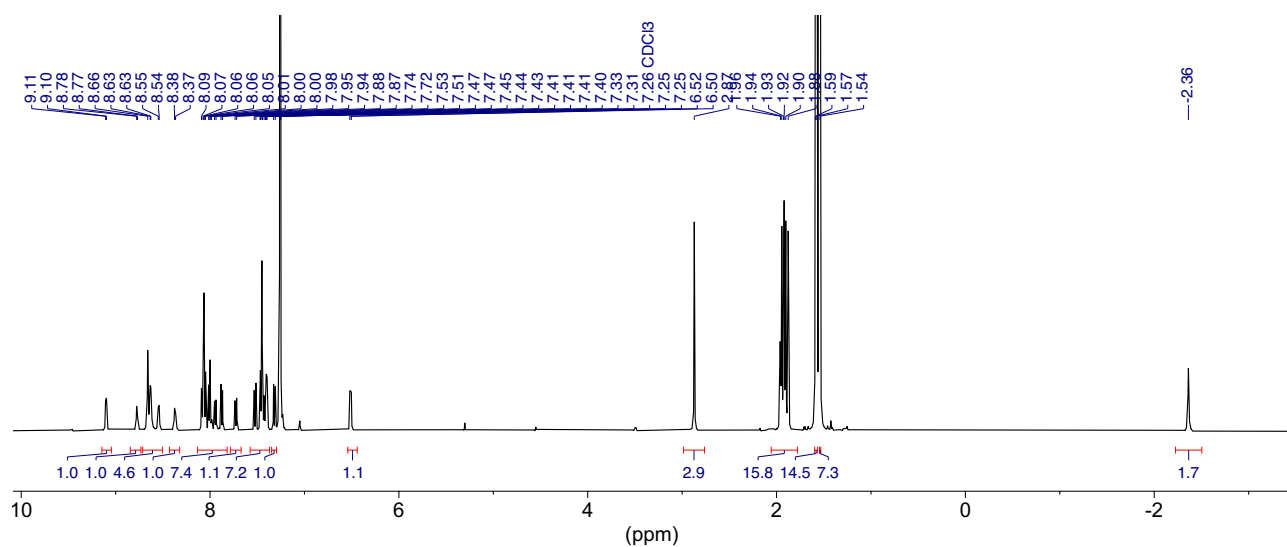

**Figure S34:** <sup>1</sup>H NMR spectrum of compound **15** in CDCl<sub>3</sub> at 298 K (500 MHz).

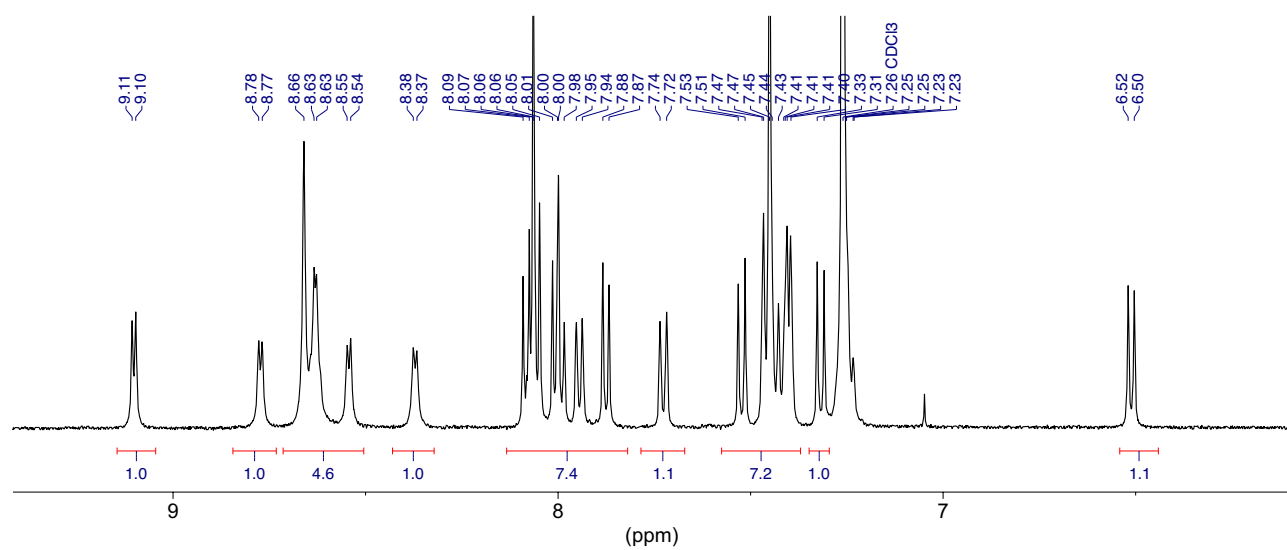

**Figure S35:** <sup>1</sup>H NMR spectrum (aromatic area) of compound **15** in CDCl<sub>3</sub> at 298 K (500 MHz).

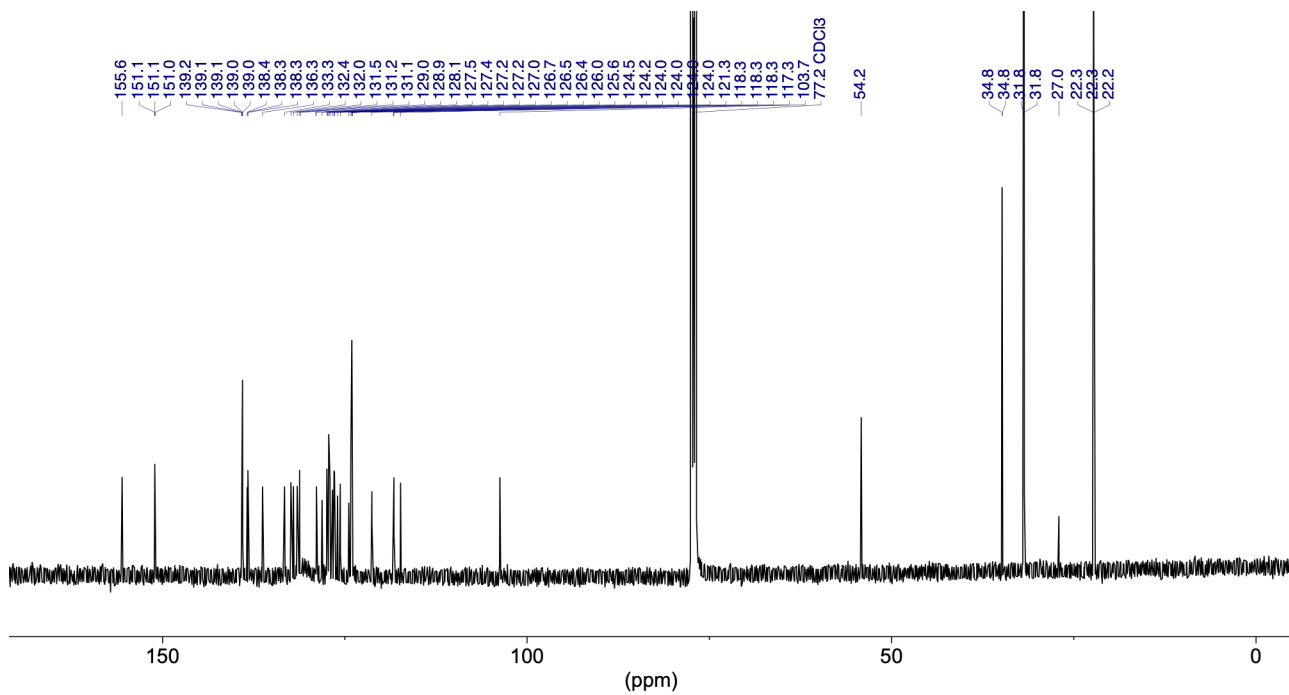

**Figure S36:**  $^{13}\text{C}$  NMR spectrum of compound **15** in  $\text{CDCl}_3$  at 298 K (126 MHz).

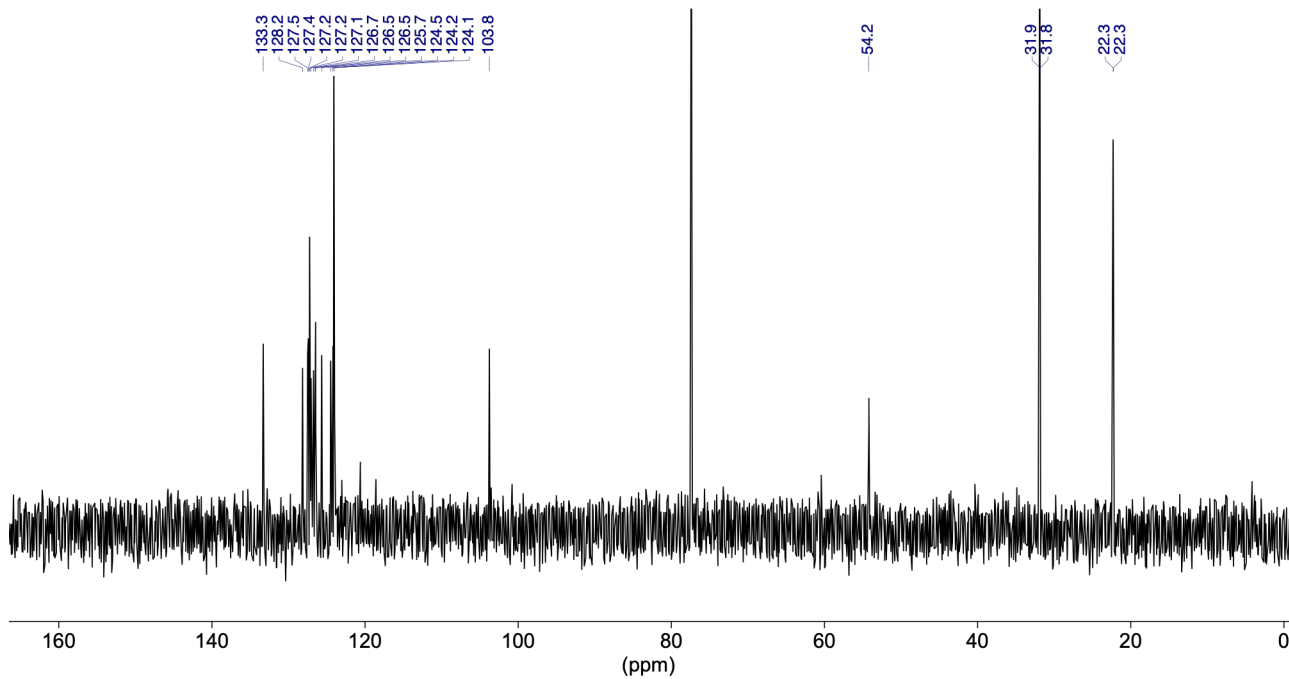

**Figure S37:**  $^{13}\text{C}$  NMR DEPT spectrum of compound **15** in  $\text{CDCl}_3$  at 298 K (126 MHz).

**Acquisition Parameter**  
 Source Type ESI Capillary 4500 V Nebulizer 0.3 Bar Set Hexapole RF 330.0 Vpp  
 Ion Polarity Positive Dry Heater 200 °C Dry Gas 3.0 l/min Set Capillary Exit 150.0 V

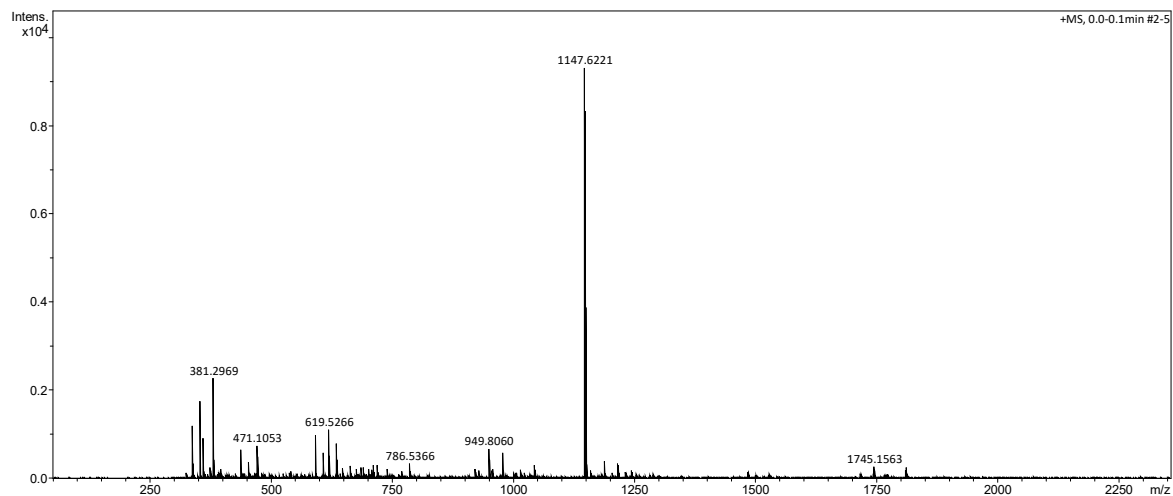

**Figure S38.** HRMS of compound **15**.

**Acquisition Parameter**  
 Source Type n/a Ion Polarity Positive Set Corrector Fill 50.9 V  
 Scan Begin 50 m/z Scan End 3000 m/z Scan End n/a Set Detector TOF 2008.9 V  
 Set Reflecto 1800.0 V  
 Set Flight Tube 8600.0 V

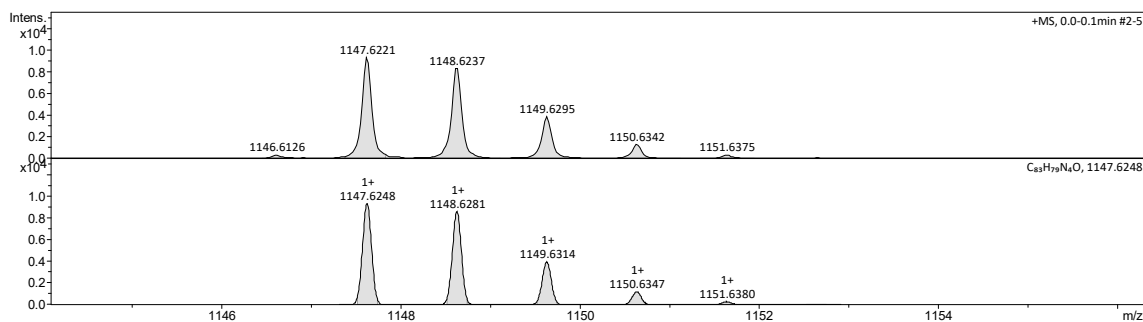

| Meas. m/z   | # | Ion Formula                                      | m/z err [ppm] | Mean err [ppm] | rdb | N-Rule | e <sup>-</sup> | Conf | mSigma | Std I | Std Mean | m/z | Std I | VarNorm | Std m/z | Diff | Std Comb | Dev |
|-------------|---|--------------------------------------------------|---------------|----------------|-----|--------|----------------|------|--------|-------|----------|-----|-------|---------|---------|------|----------|-----|
| 1147.622132 | 1 | C <sub>83</sub> H <sub>79</sub> N <sub>4</sub> O | 1147.624840   | 2.4            | 2.2 | 46.5   | ok             | even | 13.3   | 10.3  |          |     | n.a.  | n.a.    | n.a.    |      | n.a.     |     |

**Figure S39.** HRMS of compound **15** (top: experimental MS, bottom: simulation).

## Analytical chiral HPLC separation for compound 15

- The sample is dissolved in dichloromethane, injected on the chiral column, and detected with a UV detector at 254 nm and a circular dichroism detector at 254 nm. The flow-rate is 1 mL/min.

| Column         | Mobile Phase                      | t1       | k1   | t2       | k2   | $\alpha$ | Rs   |
|----------------|-----------------------------------|----------|------|----------|------|----------|------|
| (S,S)-Whelk-O1 | Heptane / dichloromethane (80/20) | 6.56 (-) | 1.22 | 7.71 (+) | 1.61 | 1.32     | 2.99 |

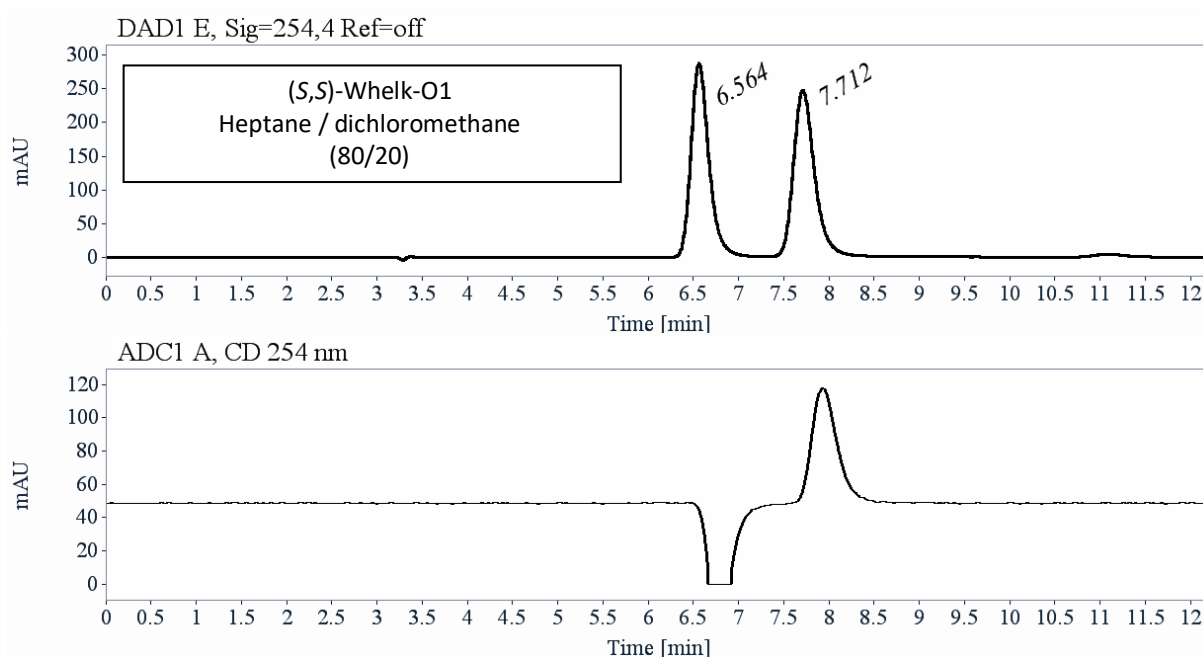

| RT [min] | Area | Area%  | Capacity Factor | Enantioselectivity | Resolution (USP) |
|----------|------|--------|-----------------|--------------------|------------------|
| 6.56     | 4002 | 49.73  | 1.22            |                    |                  |
| 7.71     | 4046 | 50.27  | 1.61            | 1.32               | 2.99             |
| Sum      | 8047 | 100.00 |                 |                    |                  |

## Preparative separation for compound 15

- Sample preparation: About 10.5 mg of compound **15** are dissolved in 1.8 mL of a mixture of dichloromethane and hexane (56/44).
- Chromatographic conditions: (*S,S*)-Whelk-O1 (250 x 10 mm), hexane / dichloromethane (80/20) as mobile phase, flow-rate = 5 mL/min, UV detection at 310 nm.
- Injections (stacked): 36 times 50  $\mu$ L, every 8 minutes.
- First fraction: 4.5 mg of the first eluted enantiomer with ee > 99.5 %

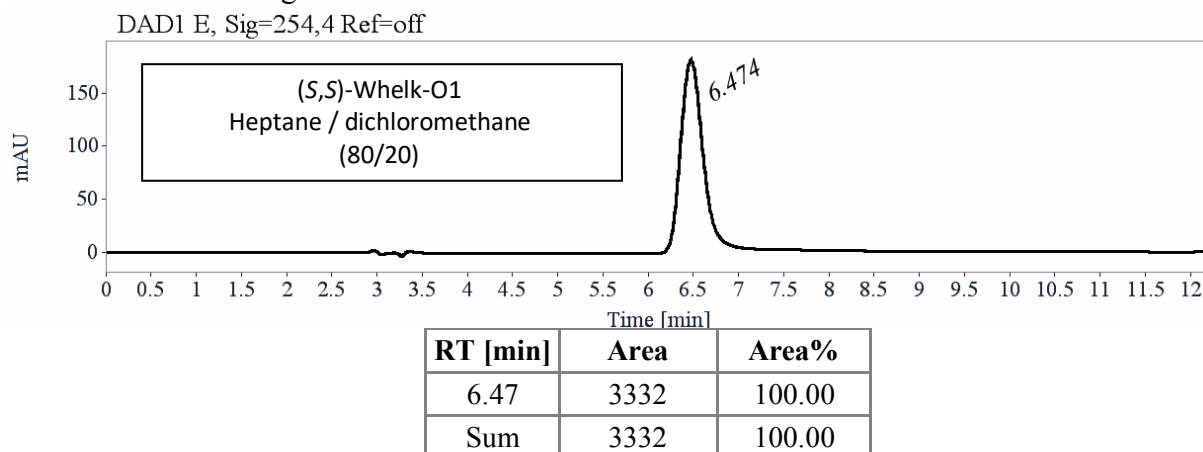

- Second fraction: 4.5 mg of the second eluted enantiomer with ee > 99 %

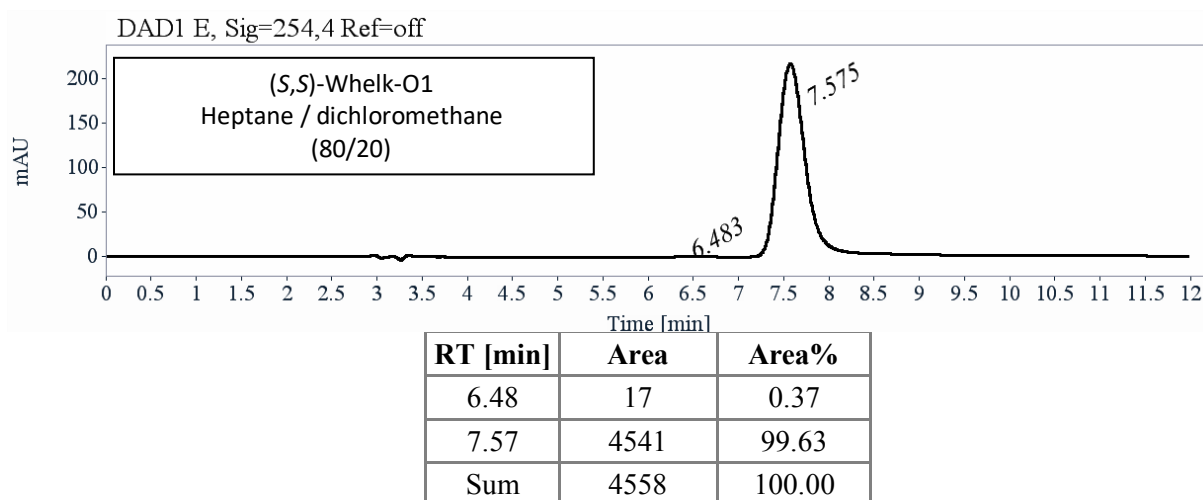

Intermediate: 1.5 mg

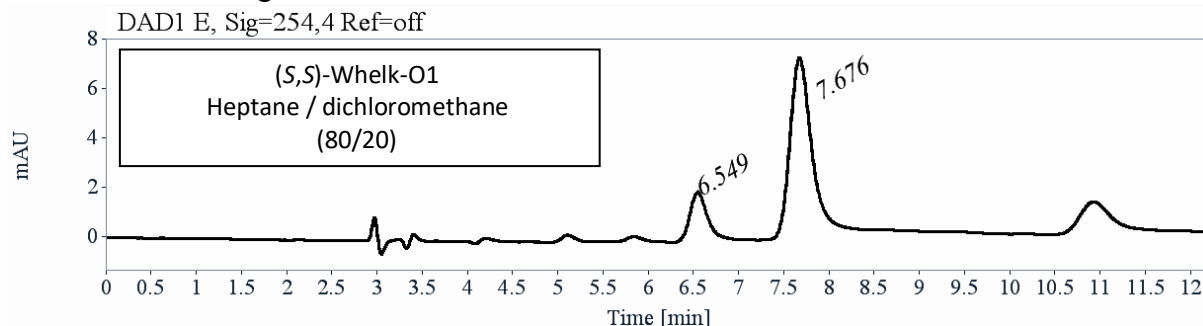

## Electronic Circular Dichroism - compound 15

ECD and UV spectra were measured on a JASCO J-815 spectrometer equipped with a JASCO Peltier cell holder PTC-423 to maintain the temperature at  $25.0 \pm 0.2^\circ\text{C}$ . A CD quartz cell of 1 mm of optical pathlength was used. The CD spectrometer was purged with nitrogen before recording each spectrum, which was baseline subtracted.

The baseline was always measured for the same solvent and in the same cell as the samples.

The spectra are presented without smoothing and further data processing.

Compound **15**, first eluted on (*S,S*)-Whelk-O1: green solid line, concentration =  $0.047 \text{ mmol.L}^{-1}$  in dichloromethane.

Compound **15**, second eluted on (*S,S*)-Whelk-O1: red dotted line, concentration =  $0.045 \text{ mmol.L}^{-1}$  in dichloromethane.

Acquisition parameters: 0.1 nm as intervals, scanning speed 50 nm/min, band width 2 nm, and 3 accumulations per sample.

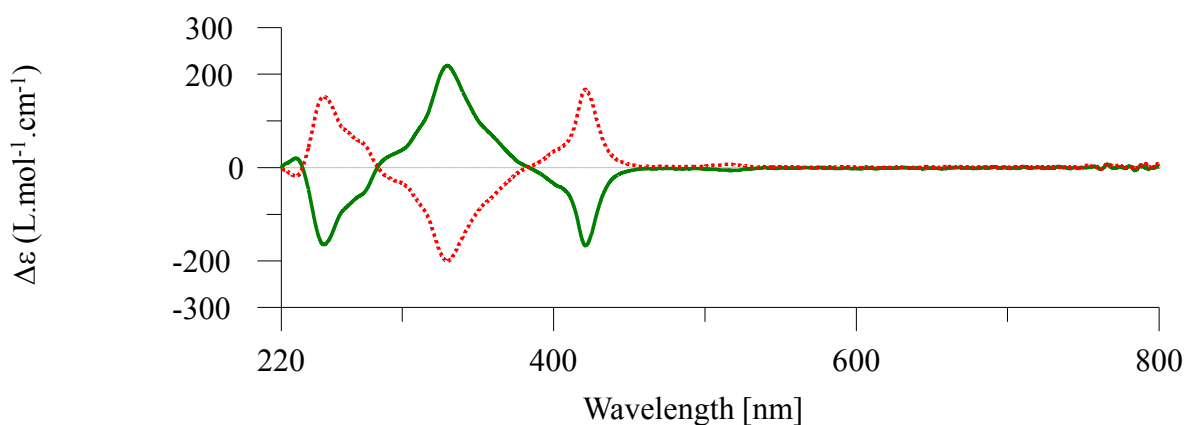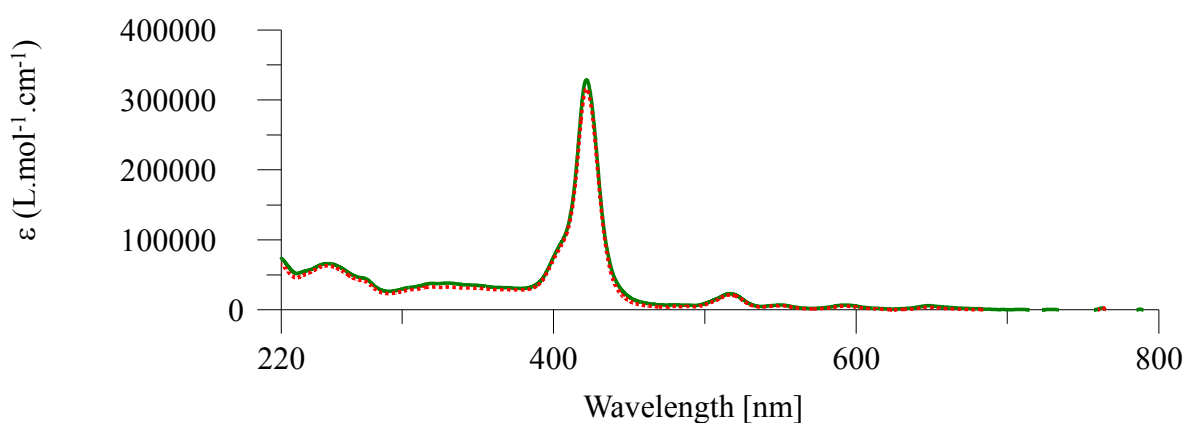

Supplement: d3ob01459b1.pdf [file d3ob01459b1.pdf]
